# Supplementary material for: The interplay of density functional selection and crystal structure for accurate NMR chemical shift predictions
Source: Royal Society of Chemistry journal article supplement (doi:10.1039/d4fd00072b), 2024-05-17
Supplement: d4fd00072b1.pdf [file d4fd00072b1.pdf]

# Supporting Information for: “The interplay of density functional selection and crystal structure for accurate NMR chemical shift predictions”

Sebastian A. Ramos, Leonard J. Mueller, and Gregory J. O. Beran\*

*Department of Chemistry, University of California, Riverside, California 92521 USA*

E-mail: gregory.beran@ucr.edu

## Contents

|                                                                                                        |           |
|--------------------------------------------------------------------------------------------------------|-----------|
| <b>S1 <math>^{13}\text{C}</math> and <math>^{15}\text{N}</math> benchmark datasets</b>                 | <b>2</b>  |
| S1.1 List of crystal structures included in the $^{13}\text{C}$ and $^{15}\text{N}$ datasets . . . . . | 2         |
| S1.2 Comparison of DFT and experimental crystal structures . . . . .                                   | 5         |
| S1.3 Experimental and calculated chemical shifts for the $^{13}\text{C}$ dataset . . . . .             | 7         |
| S1.4 Experimental and calculated chemical shifts for the $^{15}\text{N}$ dataset . . . . .             | 13        |
| <b>S2 Impact of variable unit cell crystal structure optimizations</b>                                 | <b>15</b> |
| S2.1 Comparison of variable-cell DFT and experimental crystal structures . . . . .                     | 16        |
| S2.2 Nitrogen variable-cell predicted shifts . . . . .                                                 | 17        |
| <b>S3 NMR crystallography case studies</b>                                                             | <b>20</b> |
| S3.1 Testosterone . . . . .                                                                            | 20        |

|                              |    |
|------------------------------|----|
| S3.2 Acetaminophen . . . . . | 23 |
| S3.3 Phenobarbital . . . . . | 25 |

**References** **27**

**Note:** Crystal structures (CIF format) for all structures analyzed in this study are provided as separate files. For convenience, XYZ-format files containing the monomer geometries used to compute the monomer corrections to the chemical shielding are also included. Those monomer structures were extracted directly from the optimized crystal structures.

## S1 $^{13}\text{C}$ and $^{15}\text{N}$ benchmark datasets

### S1.1 List of crystal structures included in the $^{13}\text{C}$ and $^{15}\text{N}$ datasets

Tables S1 and S2 list the Cambridge Structure Database (CSD) reference codes and molecule names for the crystal structures in the  $^{13}\text{C}$  and  $^{15}\text{N}$  benchmark datasets. All experimental crystal structures were obtained at room temperature, except CYSCLM11 (203 K) and FUSVAQ01 (105 K). For both CYSCLM11 and FUSVAQ01, the difference in lattice constants between the chosen structure and room temperature is 0.1 Å or less. See ref 1 for additional discussion of the FUSVAQ01 structure.

**Table S1:** CSD Reference codes for the 21 crystal structures included in the  $^{13}\text{C}$  dataset

| RefCode  | Name                                              |
|----------|---------------------------------------------------|
| ADENOS12 | Adenosine                                         |
| ASPARM03 | L-Asparagine monohydrate                          |
| FRUCTO02 | $\beta$ -D-Fructopyranose                         |
| GLUTAM01 | L-Glutamine                                       |
| GLYCIN29 | Glycine                                           |
| HXACAN26 | Acetaminophen                                     |
| LALNIN12 | L-Alanine                                         |
| LCYSTN21 | L-Cysteine                                        |
| LSERIN01 | L-Serine                                          |
| LSERMH10 | L-Serine monohydrate                              |
| LTHREO01 | L-Threonine                                       |
| LTYROS11 | L-Tyrosine                                        |
| MBDGAL02 | Methyl- $\beta$ -D-galactopyranoside              |
| MEMANP11 | Methyl- $\alpha$ -D-manopyranoside                |
| MGALPY01 | Methyl- $\alpha$ -D-galactopyranoside monohydrate |
| MGLUCP11 | Methyl- $\alpha$ -D-glucopyranoside               |
| PERYTO10 | Pentaerythrytol                                   |
| RHAMAH12 | $\alpha$ -L-Rhamnose monohydrate                  |
| SUCROS04 | Sucrose                                           |
| SULAMD06 | 4-Aminobenzenesulfonamide                         |
| TRIPHE11 | Triphenylene                                      |

**Table S2:** CSD Reference codes for the 15 crystal structures included in the  $^{15}\text{N}$  dataset

| <b>RefCode</b> | <b>Name</b>                                           |
|----------------|-------------------------------------------------------|
| BAPLOT01       | Theophylline                                          |
| BITZAF         | Pyridoxine                                            |
| CIMETD         | Cimetidine                                            |
| CYSCLM11       | L-Cysteine hydrochloride monohydrate ( $T = 203$ K)   |
| CYTSIN         | Cytosine                                              |
| FUSVAQ01       | Adenine trihydrate ( $T = 105$ K)                     |
| GEHHEH         | <i>N</i> -(Pyridoxylidenium)tolyamine 2-nitrobenzoate |
| GEHHIL         | <i>N</i> -(Pyridoxlidene)methylamine                  |
| GLYCIN03       | Glycine                                               |
| LHISTD02       | L-Histidine (monoclinic)                              |
| LHISTD13       | L-Histidine (orthorhombic)                            |
| LTYRHC10       | L-Tyrosine hydrochloride                              |
| TEJWAG         | L-Histidine glycolate                                 |
| THYMIN01       | Thymine                                               |
| URACIL         | Uracil                                                |

## S1.2 Comparison of DFT and experimental crystal structures

Tables S3 and S4 list the rmsd15 errors<sup>2</sup> for the DFT-optimized crystal structures relative to the experimental ones. The lattice parameters were constrained to their experimental values during the structure optimizations, and hydrogen atoms were excluded from the rmsd15 comparison.

**Table S3:** The rmsd15 errors (Å) computed from overlays of the DFT-optimized and experimental crystal structures in the <sup>13</sup>C test set (fixed lattice parameter optimizations).

| RefCode     | PBE-D3(BJ)<br>Structures | PBE0-D3(BJ)<br>Structures |
|-------------|--------------------------|---------------------------|
| ADENOS12    | 0.043                    | 0.028                     |
| ASPARM03    | 0.022                    | 0.029                     |
| FRUCTO02    | 0.043                    | 0.056                     |
| GLUTAM01    | 0.056                    | 0.037                     |
| GLYCIN29    | 0.302                    | 0.268                     |
| HXACAN09    | 0.119                    | 0.090                     |
| INDMET      | 0.133                    | 0.150                     |
| LALNIN12    | 0.029                    | 0.025                     |
| LCYSTN21    | 0.590                    | 0.067                     |
| LSERIN01    | 0.036                    | 0.029                     |
| LSERMH10    | 0.081                    | 0.066                     |
| LTHREO01    | 0.039                    | 0.077                     |
| LTYROS11    | 0.286                    | 0.270                     |
| MBDGAL02    | 0.085                    | 0.119                     |
| MEMANP11    | 0.049                    | 0.066                     |
| MGALPY01    | 0.088                    | 0.066                     |
| MGLUCP11    | 0.138                    | 0.126                     |
| PERYTO10    | 0.034                    | 0.036                     |
| RHAMAH12    | 0.033                    | 0.040                     |
| SUCROS04    | 0.032                    | 0.048                     |
| SULAMD06    | 0.131                    | 0.155                     |
| TRIPHE11    | 0.486                    | 0.547                     |
| <b>Mean</b> | <b>0.130</b>             | <b>0.109</b>              |

**Table S4:** The rmsd15 errors ( $\text{\AA}$ ) computed from overlays of the DFT-optimized and experimental crystal structures in the  $^{15}\text{N}$  test set (fixed lattice parameter optimizations).

| RefCode     | PBE-D3(BJ)<br>Structures | PBE0-D3(BJ)<br>Structures |
|-------------|--------------------------|---------------------------|
| BAPLOT01    | 0.214                    | 0.008                     |
| BITZAF      | 0.357                    | 0.312                     |
| CIMETD      | 0.109                    | 0.092                     |
| CYSCLM11    | 0.122                    | 0.102                     |
| CYTSIN      | 0.186                    | 0.182                     |
| FUSVAQ01    | 0.028                    | 0.029                     |
| GEHHEH      | 0.332                    | 0.364                     |
| GEHHIL      | 0.097                    | 0.133                     |
| GLYCIN03    | 0.238                    | 0.264                     |
| LHISTD02    | 0.050                    | 0.048                     |
| LHISTD13    | 0.080                    | 0.088                     |
| LTYRHC10    | 0.106                    | 0.110                     |
| TEJWAG      | 0.077                    | 0.053                     |
| THYMIN01    | 0.125                    | 0.125                     |
| URACIL      | 0.167                    | 0.170                     |
| <b>Mean</b> | <b>0.153</b>             | <b>0.140</b>              |

### S1.3 Experimental and calculated chemical shifts for the $^{13}\text{C}$ dataset

Tables S5 and S6 list the experimental and computed chemical shifts (ppm) for the  $^{13}\text{C}$  dataset for structures optimized with the PBE-D3(BJ) and PBE0-D3(BJ) functionals, respectively. The structure optimizations were constrained to retain the experimental lattice parameters.

**Table S5:** Experimental and predicted values for the 132 chemical shifts (ppm) in the  $^{13}\text{C}$  benchmark dataset, as computed with GIPAW PBE and after monomer-correction with various functionals. The crystal structures were optimized with PBE-D3(BJ).

| $^{13}\text{C}$ Chemical Shifts (ppm) using PBE-D3(BJ) Structures |             |           |                       |                       |                          |                             |
|-------------------------------------------------------------------|-------------|-----------|-----------------------|-----------------------|--------------------------|-----------------------------|
| RefCode                                                           | Expt. Shift | GIPAW PBE | GIPAW + $\Delta$ TPSS | GIPAW + $\Delta$ PBE0 | GIPAW + $\Delta$ PBE0-DH | GIPAW + $\Delta$ DSD-PBEP86 |
| ADENOS12                                                          | 154.1       | 153.6     | 152.4                 | 154.9                 | 155.2                    | 153.3                       |
|                                                                   | 147.9       | 146.5     | 146.9                 | 147.4                 | 148.1                    | 147.6                       |
|                                                                   | 119.3       | 120.9     | 120.2                 | 120.2                 | 120.2                    | 121.6                       |
|                                                                   | 154.7       | 151.0     | 152.1                 | 152.8                 | 154.0                    | 154.9                       |
|                                                                   | 137.4       | 136.3     | 135.9                 | 138.9                 | 139.7                    | 137.5                       |
|                                                                   | 91.9        | 96.2      | 95.6                  | 92.9                  | 92.3                     | 94.5                        |
|                                                                   | 74.6        | 77.2      | 76.5                  | 75.3                  | 74.8                     | 75.8                        |
|                                                                   | 70.9        | 73.6      | 73.1                  | 71.8                  | 71.4                     | 72.2                        |
|                                                                   | 84.5        | 87.1      | 85.8                  | 84.8                  | 84.2                     | 85.8                        |
|                                                                   | 62.5        | 62.8      | 62.4                  | 62.2                  | 61.9                     | 61.9                        |
| ASPARM03                                                          | 176.4       | 178.0     | 178.3                 | 178.6                 | 178.4                    | 178.3                       |
|                                                                   | 51.8        | 49.1      | 50.0                  | 51.7                  | 52.2                     | 51.3                        |
|                                                                   | 36.1        | 32.0      | 33.4                  | 34.9                  | 35.4                     | 33.5                        |
|                                                                   | 177.1       | 173.6     | 173.9                 | 174.7                 | 174.8                    | 174.5                       |
| FRUCTO02                                                          | 65.4        | 65.6      | 65.6                  | 65.4                  | 65.4                     | 65.8                        |
|                                                                   | 99.7        | 107.2     | 106.2                 | 102.4                 | 101.2                    | 103.6                       |
|                                                                   | 67.2        | 68.4      | 68.3                  | 67.3                  | 66.9                     | 67.4                        |
|                                                                   | 69.0        | 68.6      | 68.2                  | 67.6                  | 67.1                     | 67.6                        |
|                                                                   | 71.4        | 74.1      | 73.6                  | 72.3                  | 71.8                     | 72.6                        |
| GLUTAM01                                                          | 64.9        | 66.6      | 66.5                  | 66.2                  | 66.2                     | 66.6                        |
|                                                                   | 173.0       | 174.6     | 174.8                 | 175.6                 | 175.5                    | 174.9                       |
|                                                                   | 53.3        | 52.7      | 53.6                  | 54.9                  | 55.3                     | 54.6                        |
|                                                                   | 25.5        | 23.3      | 24.0                  | 25.4                  | 25.8                     | 24.2                        |
|                                                                   | 28.5        | 26.3      | 28.1                  | 30.0                  | 30.8                     | 28.5                        |
| GLYCIN29                                                          | 176.5       | 174.9     | 175.3                 | 176.0                 | 176.2                    | 176.0                       |
|                                                                   | 176.2       | 177.5     | 178.1                 | 178.7                 | 178.7                    | 178.3                       |
|                                                                   | 43.5        | 39.9      | 41.7                  | 44.3                  | 45.4                     | 44.0                        |
| HXACAN09                                                          | 133.1       | 131.2     | 131.2                 | 131.6                 | 131.9                    | 132.6                       |
|                                                                   | 123.4       | 122.1     | 122.0                 | 123.5                 | 124.0                    | 123.0                       |
|                                                                   | 115.7       | 113.4     | 112.8                 | 115.3                 | 115.9                    | 114.8                       |
|                                                                   | 152.3       | 152.5     | 151.6                 | 150.7                 | 150.3                    | 151.7                       |
|                                                                   | 116.4       | 115.3     | 114.6                 | 116.5                 | 117.0                    | 116.2                       |
|                                                                   | 120.6       | 118.7     | 118.3                 | 119.9                 | 120.2                    | 119.1                       |
|                                                                   | 169.8       | 167.9     | 168.1                 | 169.9                 | 170.3                    | 169.8                       |
| LALNIN12                                                          | 23.8        | 21.6      | 23.5                  | 26.3                  | 27.6                     | 25.2                        |
|                                                                   | 176.8       | 179.5     | 179.5                 | 180.0                 | 179.7                    | 179.5                       |
|                                                                   | 50.9        | 49.0      | 49.5                  | 51.4                  | 51.8                     | 50.9                        |
| LCYSTN21                                                          | 19.8        | 16.2      | 17.5                  | 20.2                  | 21.3                     | 19.3                        |
|                                                                   | 174.0       | 174.4     | 174.8                 | 175.5                 | 175.4                    | 174.8                       |
|                                                                   | 56.7        | 54.7      | 55.5                  | 56.8                  | 57.2                     | 56.7                        |
| LSERIN01                                                          | 28.8        | 29.0      | 29.1                  | 30.7                  | 30.6                     | 28.5                        |
|                                                                   | 175.1       | 176.3     | 176.7                 | 177.2                 | 177.1                    | 176.6                       |
|                                                                   | 55.6        | 53.7      | 54.5                  | 56.1                  | 56.6                     | 56.0                        |
| LSERMH10                                                          | 62.9        | 65.4      | 64.9                  | 64.3                  | 64.0                     | 64.1                        |
|                                                                   | 175.6       | 177.2     | 177.7                 | 178.3                 | 178.1                    | 177.5                       |
|                                                                   | 58.3        | 57.4      | 58.3                  | 59.4                  | 59.7                     | 59.2                        |
|                                                                   | 61.8        | 62.4      | 61.8                  | 61.4                  | 61.1                     | 61.1                        |
| LTHREO01                                                          | 171.9       | 172.2     | 172.4                 | 173.3                 | 173.3                    | 172.5                       |
|                                                                   | 61.2        | 59.0      | 59.2                  | 60.5                  | 60.7                     | 60.5                        |

*Continued on next page*

<sup>13</sup>C Chemical Shifts (ppm) using PBE-D3(BJ) Structures (continued)

| RefCode  | Expt. Shift | GIPAW PBE | GIPAW +ΔTPSS | GIPAW +ΔPBEO | GIPAW +ΔPBEO-DH | GIPAW +ΔDSD-PBEP86 |
|----------|-------------|-----------|--------------|--------------|-----------------|--------------------|
| LTYROS11 | 66.8        | 69.4      | 68.5         | 68.0         | 67.5            | 68.0               |
|          | 20.4        | 15.8      | 17.3         | 20.1         | 21.3            | 19.3               |
|          | 175.4       | 176.9     | 177.2        | 177.9        | 177.7           | 177.1              |
|          | 130.3       | 130.3     | 130.0        | 131.3        | 131.6           | 130.4              |
|          | 116.4       | 114.9     | 114.3        | 116.0        | 116.5           | 116.0              |
|          | 56.4        | 55.3      | 56.0         | 57.1         | 57.3            | 56.7               |
|          | 131.0       | 129.4     | 128.8        | 130.6        | 130.9           | 129.5              |
|          | 118.0       | 116.2     | 115.5        | 117.7        | 118.2           | 117.6              |
|          | 155.6       | 156.7     | 156.0        | 154.8        | 154.4           | 155.8              |
|          | 36.8        | 35.0      | 36.4         | 36.3         | 36.4            | 35.4               |
| MBDGAL02 | 123.6       | 121.4     | 120.4        | 121.6        | 121.7           | 121.7              |
|          | 105.7       | 111.2     | 109.3        | 105.7        | 104.3           | 107.1              |
|          | 71.2        | 71.7      | 71.2         | 70.2         | 69.9            | 70.7               |
|          | 72.1        | 74.0      | 73.4         | 72.2         | 71.8            | 72.7               |
|          | 69.3        | 71.6      | 71.3         | 70.2         | 69.8            | 70.6               |
|          | 75.6        | 76.4      | 75.5         | 74.7         | 74.4            | 75.5               |
|          | 62.8        | 63.3      | 63.2         | 62.8         | 62.6            | 62.6               |
|          | 57.6        | 59.3      | 59.1         | 60.0         | 60.4            | 60.2               |
|          | 99.6        | 104.8     | 103.4        | 100.1        | 98.8            | 101.2              |
|          | 71.3        | 72.5      | 72.1         | 71.0         | 70.6            | 71.5               |
| MEMANP11 | 71.7        | 73.5      | 72.8         | 71.7         | 71.1            | 72.0               |
|          | 64.8        | 65.7      | 65.5         | 64.8         | 64.5            | 64.6               |
|          | 71.9        | 74.0      | 73.3         | 72.6         | 72.3            | 73.2               |
|          | 58.9        | 58.5      | 58.7         | 58.6         | 58.7            | 58.6               |
|          | 54.9        | 54.7      | 54.7         | 55.9         | 56.5            | 56.0               |
|          | 100.4       | 105.4     | 104.2        | 100.8        | 99.5            | 102.0              |
|          | 67.6        | 67.7      | 67.4         | 66.6         | 66.2            | 66.7               |
|          | 72.6        | 74.4      | 73.7         | 72.9         | 72.4            | 73.3               |
|          | 70.0        | 71.3      | 70.9         | 69.5         | 69.2            | 70.2               |
|          | 72.9        | 75.3      | 74.5         | 73.8         | 73.5            | 74.5               |
| MGLUCP11 | 61.4        | 61.8      | 61.5         | 61.3         | 61.1            | 61.1               |
|          | 55.2        | 54.6      | 54.6         | 55.9         | 56.5            | 56.0               |
|          | 101.0       | 105.7     | 104.3        | 101.0        | 99.8            | 102.3              |
|          | 72.3        | 71.3      | 70.8         | 69.9         | 69.5            | 70.3               |
|          | 74.6        | 75.8      | 74.7         | 73.6         | 72.9            | 74.1               |
|          | 72.5        | 73.6      | 72.9         | 72.0         | 71.5            | 72.4               |
|          | 75.3        | 74.7      | 73.7         | 73.2         | 72.9            | 73.9               |
|          | 63.8        | 64.0      | 63.6         | 63.4         | 63.1            | 63.1               |
|          | 56.5        | 56.2      | 56.4         | 57.4         | 57.9            | 57.5               |
|          | 50.2        | 49.2      | 48.6         | 49.6         | 49.6            | 49.1               |
| PERYTO10 | 58.4        | 58.9      | 59.5         | 59.1         | 59.0            | 58.6               |
|          | 94.5        | 100.0     | 99.0         | 95.9         | 94.8            | 96.8               |
|          | 72.2        | 74.2      | 73.6         | 72.4         | 72.0            | 72.9               |
|          | 71.0        | 70.8      | 70.4         | 69.6         | 69.3            | 69.8               |
| RHAMAH12 | 72.5        | 73.8      | 72.8         | 71.8         | 71.2            | 72.0               |
|          | 69.8        | 72.3      | 71.5         | 71.0         | 70.7            | 71.4               |
|          | 17.8        | 12.8      | 15.1         | 17.8         | 19.2            | 17.0               |
|          | 93.3        | 97.0      | 96.4         | 93.5         | 92.8            | 95.0               |
|          | 66.0        | 64.4      | 64.5         | 64.0         | 63.9            | 64.2               |
|          | 73.7        | 74.5      | 74.2         | 73.1         | 72.8            | 73.8               |
|          | 102.4       | 108.6     | 108.0        | 104.7        | 103.9           | 106.4              |
|          | 72.8        | 74.3      | 73.3         | 72.3         | 71.7            | 72.6               |
|          | 82.9        | 84.6      | 83.8         | 81.7         | 80.9            | 82.4               |
|          | 67.9        | 68.5      | 68.2         | 67.5         | 67.2            | 67.7               |
| SUCROS04 | 71.8        | 71.9      | 71.0         | 70.3         | 69.8            | 70.7               |
|          | 73.6        | 75.3      | 74.7         | 73.8         | 73.4            | 74.2               |
|          | 81.8        | 81.9      | 81.0         | 80.0         | 79.6            | 81.0               |
|          | 60.0        | 59.5      | 59.7         | 59.4         | 59.4            | 59.3               |
|          | 61.0        | 61.5      | 61.8         | 61.5         | 61.6            | 61.7               |
|          | 127.1       | 127.6     | 125.6        | 124.6        | 123.8           | 125.9              |
|          | 129.5       | 127.7     | 127.5        | 130.4        | 131.1           | 128.4              |
|          | 117.1       | 114.5     | 113.7        | 114.9        | 115.2           | 115.7              |
|          | 153.4       | 149.5     | 150.2        | 151.2        | 152.2           | 152.5              |

Continued on next page



<sup>13</sup>C Chemical Shifts (ppm) using PBE-D3(BJ) Structures (*continued*)

| RefCode     | Expt. Shift | GIPAW PBE  | GIPAW + $\Delta$ TPSS | GIPAW + $\Delta$ PBE0 | GIPAW + $\Delta$ PBE0-DH | GIPAW + $\Delta$ DSD-PBEP86 |
|-------------|-------------|------------|-----------------------|-----------------------|--------------------------|-----------------------------|
| TRIPHE11    | 112.3       | 110.5      | 109.7                 | 111.1                 | 111.5                    | 111.9                       |
|             | 129.5       | 127.6      | 127.4                 | 130.3                 | 130.9                    | 128.3                       |
|             | 126.4       | 124.3      | 123.1                 | 125.1                 | 125.3                    | 124.5                       |
|             | 129.5       | 129.2      | 133.7                 | 129.6                 | 129.9                    | 130.1                       |
|             | 124.5       | 124.2      | 124.6                 | 125.0                 | 125.3                    | 124.4                       |
|             | 125.9       | 125.4      | 124.2                 | 126.1                 | 126.4                    | 125.5                       |
|             | 127.5       | 125.7      | 124.4                 | 126.3                 | 126.5                    | 125.6                       |
|             | 122.3       | 120.0      | 120.1                 | 121.0                 | 121.2                    | 120.0                       |
|             | 130.2       | 128.3      | 132.6                 | 128.5                 | 128.6                    | 128.7                       |
|             | 129.5       | 127.9      | 132.1                 | 128.3                 | 128.6                    | 128.7                       |
|             | 120.9       | 118.4      | 118.5                 | 119.6                 | 119.8                    | 118.6                       |
|             | 125.9       | 123.7      | 122.4                 | 124.4                 | 124.7                    | 123.7                       |
|             | 121.7       | 119.1      | 119.4                 | 120.2                 | 120.6                    | 119.4                       |
|             | 129.5       | 127.8      | 132.1                 | 128.2                 | 128.7                    | 128.9                       |
|             | 129.5       | 126.4      | 130.7                 | 126.8                 | 127.2                    | 127.2                       |
|             | 122.3       | 121.2      | 121.5                 | 122.2                 | 122.5                    | 121.5                       |
|             | 126.9       | 126.3      | 125.1                 | 126.9                 | 127.1                    | 126.3                       |
|             | 126.9       | 124.5      | 123.3                 | 125.3                 | 125.5                    | 124.6                       |
| 123.8       | 124.9       | 125.4      | 125.7                 | 125.9                 | 124.9                    |                             |
| 129.8       | 127.6       | 131.9      | 127.9                 | 128.2                 | 128.2                    |                             |
| <b>RMSE</b> |             | <b>2.3</b> | <b>2.0</b>            | <b>1.3</b>            | <b>1.4</b>               | <b>1.3</b>                  |

**Table S6:** Experimental and predicted values for the 132 chemical shifts (ppm) in the  $^{13}\text{C}$  benchmark dataset, as computed with GIPAW PBE and after monomer-correction with various functionals. The crystal structures were optimized with PBE0-D3(BJ).

| $^{13}\text{C}$ Chemical Shifts using PBE0-D3(BJ) Structures |             |           |                       |                       |                          |                             |
|--------------------------------------------------------------|-------------|-----------|-----------------------|-----------------------|--------------------------|-----------------------------|
| RefCode                                                      | Expt. Shift | GIPAW PBE | GIPAW + $\Delta$ TPSS | GIPAW + $\Delta$ PBE0 | GIPAW + $\Delta$ PBE0-DH | GIPAW + $\Delta$ DSD-PBEP86 |
| ADENOS12                                                     | 154.1       | 153.4     | 152.2                 | 154.7                 | 155.0                    | 153.2                       |
|                                                              | 147.9       | 146.7     | 147.1                 | 147.7                 | 148.3                    | 147.9                       |
|                                                              | 119.3       | 121.3     | 120.5                 | 120.6                 | 120.5                    | 121.9                       |
|                                                              | 154.7       | 151.4     | 152.6                 | 153.3                 | 154.5                    | 155.3                       |
|                                                              | 137.4       | 136.0     | 135.4                 | 138.5                 | 139.2                    | 137.3                       |
|                                                              | 91.9        | 95.8      | 95.2                  | 92.6                  | 92.0                     | 94.1                        |
|                                                              | 74.6        | 76.9      | 76.2                  | 75.1                  | 74.7                     | 75.6                        |
|                                                              | 70.9        | 73.3      | 72.9                  | 71.7                  | 71.3                     | 72.1                        |
|                                                              | 84.5        | 86.6      | 85.3                  | 84.3                  | 83.8                     | 85.3                        |
|                                                              | 62.5        | 63.2      | 62.7                  | 62.5                  | 62.2                     | 62.2                        |
| ASPARM03                                                     | 176.4       | 176.5     | 176.7                 | 176.9                 | 176.8                    | 176.8                       |
|                                                              | 51.8        | 48.7      | 49.5                  | 51.2                  | 51.7                     | 50.8                        |
|                                                              | 36.1        | 32.3      | 33.7                  | 35.1                  | 35.6                     | 33.7                        |
|                                                              | 177.1       | 173.4     | 173.6                 | 174.3                 | 174.5                    | 174.2                       |
| FRUCTO02                                                     | 65.4        | 65.7      | 65.7                  | 65.4                  | 65.4                     | 65.8                        |
|                                                              | 99.7        | 104.8     | 103.9                 | 100.5                 | 99.5                     | 101.7                       |
|                                                              | 67.2        | 67.5      | 67.4                  | 66.5                  | 66.2                     | 66.6                        |
|                                                              | 69.0        | 68.6      | 68.1                  | 67.5                  | 67.1                     | 67.6                        |
|                                                              | 71.4        | 73.6      | 73.2                  | 71.9                  | 71.4                     | 72.3                        |
|                                                              | 64.9        | 65.9      | 65.8                  | 65.5                  | 65.5                     | 65.9                        |
| GLUTAM01                                                     | 173.0       | 173.2     | 173.3                 | 174.1                 | 174.0                    | 173.6                       |
|                                                              | 53.3        | 52.4      | 53.2                  | 54.4                  | 54.8                     | 54.2                        |
|                                                              | 25.5        | 23.7      | 24.4                  | 25.7                  | 26.0                     | 24.6                        |
|                                                              | 28.5        | 26.5      | 28.2                  | 30.1                  | 30.8                     | 28.5                        |
| GLYCIN29                                                     | 176.5       | 174.8     | 175.0                 | 175.7                 | 175.9                    | 175.8                       |
|                                                              | 176.2       | 175.9     | 176.4                 | 176.9                 | 177.0                    | 176.7                       |
| HXACAN09                                                     | 43.5        | 40.2      | 41.8                  | 44.3                  | 45.4                     | 44.1                        |
|                                                              | 133.1       | 131.8     | 131.7                 | 132.2                 | 132.7                    | 133.2                       |
|                                                              | 123.4       | 123.3     | 123.0                 | 124.7                 | 125.2                    | 124.1                       |
|                                                              | 115.7       | 114.4     | 113.6                 | 116.3                 | 116.8                    | 115.5                       |
|                                                              | 152.3       | 152.8     | 151.7                 | 151.0                 | 150.4                    | 151.6                       |
|                                                              | 116.4       | 116.5     | 115.7                 | 117.7                 | 118.1                    | 117.1                       |
|                                                              | 120.6       | 119.7     | 119.0                 | 120.8                 | 121.2                    | 119.9                       |
|                                                              | 169.8       | 167.3     | 167.3                 | 169.7                 | 170.1                    | 169.3                       |
| LALNIN12                                                     | 23.8        | 21.7      | 23.4                  | 26.2                  | 27.4                     | 25.1                        |
|                                                              | 176.8       | 178.1     | 178.2                 | 178.5                 | 178.3                    | 178.2                       |
|                                                              | 50.9        | 48.9      | 49.5                  | 51.3                  | 51.7                     | 50.8                        |
| LACYSTN21                                                    | 19.8        | 17.1      | 18.5                  | 21.0                  | 22.1                     | 20.2                        |
|                                                              | 174.0       | 172.7     | 172.9                 | 173.6                 | 173.6                    | 173.1                       |
|                                                              | 56.7        | 54.6      | 55.5                  | 56.6                  | 57.1                     | 56.7                        |
| LSERIN01                                                     | 28.8        | 28.2      | 28.2                  | 29.9                  | 29.8                     | 27.9                        |
|                                                              | 175.1       | 174.9     | 175.0                 | 175.5                 | 175.4                    | 175.1                       |
|                                                              | 55.6        | 53.7      | 54.5                  | 56.1                  | 56.6                     | 56.0                        |
| LSERMH10                                                     | 62.9        | 65.0      | 64.4                  | 63.9                  | 63.5                     | 63.6                        |
|                                                              | 175.6       | 175.8     | 176.1                 | 176.7                 | 176.5                    | 176.2                       |
|                                                              | 58.3        | 57.4      | 58.2                  | 59.3                  | 59.6                     | 59.2                        |
| LTHREO01                                                     | 61.8        | 62.3      | 61.7                  | 61.3                  | 61.0                     | 61.0                        |
|                                                              | 171.9       | 170.8     | 171.0                 | 171.9                 | 171.9                    | 171.3                       |
|                                                              | 61.2        | 59.0      | 59.2                  | 60.4                  | 60.6                     | 60.4                        |
|                                                              | 66.8        | 68.9      | 68.1                  | 67.6                  | 67.2                     | 67.7                        |
|                                                              | 20.4        | 17.1      | 18.6                  | 21.2                  | 22.4                     | 20.6                        |
| LTYROS11                                                     | 175.4       | 175.3     | 175.5                 | 176.2                 | 176.0                    | 175.5                       |
|                                                              | 130.3       | 131.4     | 131.0                 | 132.3                 | 132.7                    | 131.5                       |
|                                                              | 116.4       | 115.7     | 115.0                 | 116.7                 | 117.2                    | 116.6                       |
|                                                              | 56.4        | 55.3      | 55.9                  | 57.0                  | 57.2                     | 56.6                        |
|                                                              | 131.0       | 130.7     | 130.2                 | 131.9                 | 132.2                    | 130.7                       |
|                                                              | 118.0       | 116.9     | 116.2                 | 118.4                 | 118.9                    | 118.2                       |
|                                                              | 155.6       | 157.2     | 156.4                 | 155.5                 | 155.1                    | 156.4                       |

*Continued on next page*

<sup>13</sup>C Chemical Shifts using PBE0-D3(BJ) Structures (continued)

| RefCode  | Expt. Shift | GIPAW PBE | GIPAW +ΔTPSS | GIPAW +ΔPBEO | GIPAW +ΔPBEO-DH | GIPAW +ΔDSD-PBEP86 |
|----------|-------------|-----------|--------------|--------------|-----------------|--------------------|
| MBDGAL02 | 36.8        | 35.7      | 37.1         | 36.8         | 37.0            | 36.0               |
|          | 123.6       | 122.2     | 121.2        | 122.5        | 122.5           | 122.5              |
|          | 105.7       | 110.3     | 108.3        | 105.0        | 103.6           | 106.3              |
|          | 71.2        | 71.6      | 71.0         | 70.1         | 69.7            | 70.5               |
|          | 72.1        | 73.9      | 73.1         | 72.1         | 71.6            | 72.5               |
|          | 69.3        | 70.8      | 70.5         | 69.5         | 69.1            | 69.9               |
|          | 75.6        | 76.1      | 75.2         | 74.5         | 74.1            | 75.2               |
| MEMANP11 | 62.8        | 63.6      | 63.4         | 63.0         | 62.8            | 62.8               |
|          | 57.6        | 58.7      | 58.5         | 59.4         | 59.8            | 59.6               |
|          | 99.6        | 103.5     | 102.1        | 99.1         | 97.9            | 100.1              |
|          | 71.3        | 72.4      | 71.9         | 71.0         | 70.6            | 71.4               |
|          | 71.7        | 73.5      | 72.8         | 71.7         | 71.2            | 72.1               |
|          | 64.8        | 64.9      | 64.8         | 64.2         | 63.9            | 64.0               |
|          | 71.9        | 73.3      | 72.6         | 71.9         | 71.6            | 72.4               |
| MGALPY01 | 58.9        | 58.5      | 58.5         | 58.5         | 58.6            | 58.5               |
|          | 54.9        | 54.2      | 54.3         | 55.4         | 56.0            | 55.5               |
|          | 100.4       | 104.1     | 103.0        | 99.8         | 98.6            | 100.9              |
|          | 67.6        | 67.4      | 67.1         | 66.3         | 65.9            | 66.5               |
|          | 72.6        | 73.7      | 73.1         | 72.2         | 71.8            | 72.6               |
|          | 70.0        | 71.2      | 71.0         | 69.5         | 69.2            | 70.2               |
|          | 72.9        | 74.3      | 73.5         | 72.8         | 72.5            | 73.4               |
| MGLUCP11 | 61.4        | 62.8      | 62.4         | 62.2         | 61.9            | 62.0               |
|          | 55.2        | 54.4      | 54.3         | 55.5         | 56.1            | 55.7               |
|          | 101.0       | 104.2     | 103.0        | 99.8         | 98.7            | 101.1              |
|          | 72.3        | 71.1      | 70.6         | 69.8         | 69.5            | 70.2               |
|          | 74.6        | 75.6      | 74.5         | 73.4         | 72.8            | 74.0               |
|          | 72.5        | 73.3      | 72.6         | 71.8         | 71.3            | 72.2               |
|          | 75.3        | 74.3      | 73.4         | 72.9         | 72.6            | 73.5               |
| PERYTO10 | 63.8        | 64.2      | 63.9         | 63.6         | 63.2            | 63.3               |
|          | 56.5        | 56.1      | 56.3         | 57.2         | 57.7            | 57.3               |
|          | 50.2        | 49.3      | 48.6         | 49.7         | 49.7            | 49.2               |
| RHAMAH12 | 58.4        | 58.8      | 59.4         | 58.9         | 58.8            | 58.5               |
|          | 94.5        | 98.5      | 97.5         | 94.6         | 93.6            | 95.5               |
|          | 72.2        | 73.6      | 73.0         | 71.9         | 71.5            | 72.3               |
|          | 71.0        | 71.0      | 70.5         | 69.8         | 69.4            | 70.0               |
|          | 72.5        | 73.5      | 72.4         | 71.6         | 71.0            | 71.8               |
| SUCROS04 | 69.8        | 71.3      | 70.5         | 70.1         | 69.8            | 70.5               |
|          | 17.8        | 13.7      | 15.8         | 18.4         | 19.8            | 17.7               |
|          | 93.3        | 95.4      | 95.0         | 92.3         | 91.6            | 93.6               |
|          | 66.0        | 64.9      | 65.0         | 64.5         | 64.4            | 64.7               |
|          | 73.7        | 74.2      | 73.8         | 72.8         | 72.6            | 73.5               |
|          | 102.4       | 106.3     | 105.7        | 102.8        | 102.1           | 104.4              |
|          | 72.8        | 73.8      | 72.8         | 71.9         | 71.4            | 72.2               |
|          | 82.9        | 85.0      | 84.3         | 82.2         | 81.4            | 82.9               |
|          | 67.9        | 68.4      | 68.1         | 67.4         | 67.1            | 67.6               |
|          | 71.8        | 72.1      | 71.2         | 70.5         | 70.1            | 70.9               |
| SULAMD06 | 73.6        | 74.6      | 74.1         | 73.1         | 72.8            | 73.5               |
|          | 81.8        | 81.8      | 80.9         | 79.9         | 79.5            | 80.9               |
|          | 60.0        | 59.2      | 59.4         | 59.2         | 59.2            | 59.1               |
|          | 61.0        | 61.2      | 61.5         | 61.2         | 61.3            | 61.4               |
|          | 127.1       | 126.8     | 124.9        | 124.2        | 123.5           | 125.4              |
|          | 129.5       | 128.9     | 128.7        | 131.5        | 132.2           | 129.6              |
|          | 117.1       | 115.3     | 114.4        | 115.7        | 115.9           | 116.3              |
|          | 153.4       | 150.6     | 151.1        | 152.2        | 153.1           | 153.4              |
|          | 112.3       | 111.3     | 110.4        | 111.9        | 112.2           | 112.6              |
|          | 129.5       | 128.8     | 128.6        | 131.5        | 132.1           | 129.6              |
| TRIPHE11 | 126.4       | 125.8     | 124.5        | 126.5        | 126.7           | 125.9              |
|          | 129.5       | 130.7     | 135.3        | 130.9        | 131.1           | 131.3              |
|          | 124.5       | 125.7     | 126.3        | 126.6        | 126.8           | 125.9              |
|          | 125.9       | 126.9     | 125.6        | 127.6        | 127.8           | 126.9              |
|          | 127.5       | 126.8     | 125.5        | 127.4        | 127.6           | 126.7              |
|          | 122.3       | 121.2     | 121.4        | 122.2        | 122.4           | 121.2              |
|          | 130.2       | 129.1     | 133.5        | 129.2        | 129.3           | 129.3              |

Continued on next page

<sup>13</sup>C Chemical Shifts using PBE0-D3(BJ) Structures (*continued*)

| RefCode     | Expt.<br>Shift | GIPAW<br>PBE | GIPAW<br>+ΔTPSS | GIPAW<br>+ΔPBE0 | GIPAW<br>+ΔPBE0-DH | GIPAW<br>+ΔDSD-PBEP86 |
|-------------|----------------|--------------|-----------------|-----------------|--------------------|-----------------------|
|             | 129.5          | 128.8        | 133.2           | 129.2           | 129.3              | 129.4                 |
|             | 120.9          | 120.3        | 120.5           | 121.3           | 121.5              | 120.4                 |
|             | 125.9          | 124.5        | 123.2           | 125.2           | 125.4              | 124.4                 |
|             | 121.7          | 120.0        | 120.4           | 121.2           | 121.5              | 120.4                 |
|             | 129.5          | 128.8        | 133.3           | 129.2           | 129.7              | 129.9                 |
|             | 129.5          | 127.4        | 131.8           | 127.7           | 128.1              | 128.1                 |
|             | 122.3          | 122.5        | 122.8           | 123.5           | 123.8              | 122.7                 |
|             | 126.9          | 127.7        | 126.5           | 128.2           | 128.4              | 127.7                 |
|             | 126.9          | 125.5        | 124.2           | 126.1           | 126.3              | 125.4                 |
|             | 123.8          | 126.4        | 129.4           | 127.2           | 127.3              | 126.3                 |
|             | 129.8          | 128.4        | 132.9           | 128.7           | 129.0              | 128.9                 |
| <b>RMSE</b> |                | <b>1.8</b>   | <b>1.7</b>      | <b>1.1</b>      | <b>1.3</b>         | <b>0.9</b>            |

## S1.4 Experimental and calculated chemical shifts for the $^{15}\text{N}$ dataset

Tables S7 and S8 list the experimental and computed shifts for the  $^{15}\text{N}$  dataset for structures optimized with the PBE-D3(BJ) and PBE0-D3(BJ) functionals, respectively. The structure optimizations were constrained to preserve the experimental lattice parameters.

**Table S7:** Experimental and predicted values for the 35 chemical shifts (ppm) in the  $^{15}\text{N}$  benchmark dataset, as computed with GIPAW PBE and after monomer-correction with various functionals. The crystal structures were optimized with PBE-D3(BJ).

| $^{15}\text{N}$ Chemical Shifts (ppm) using PBE-D3(BJ) Structures |             |            |                       |                       |                          |                             |
|-------------------------------------------------------------------|-------------|------------|-----------------------|-----------------------|--------------------------|-----------------------------|
| RefCode                                                           | Expt. Shift | GIPAW PBE  | GIPAW + $\Delta$ TPSS | GIPAW + $\Delta$ PBE0 | GIPAW + $\Delta$ PBE0-DH | GIPAW + $\Delta$ DSD-PBEP86 |
| BITZAF                                                            | 249.5       | 244.2      | 244.1                 | 247.6                 | 248.3                    | 244.9                       |
| GEHHEH                                                            | 187.4       | 172.9      | 177.0                 | 175.7                 | 178.3                    | 180.6                       |
|                                                                   | 261.0       | 248.2      | 249.7                 | 252.8                 | 254.3                    | 253.0                       |
| GEHHIL                                                            | 268.5       | 271.4      | 270.5                 | 271.8                 | 271.3                    | 265.2                       |
|                                                                   | 261.2       | 258.1      | 256.6                 | 259.7                 | 259.7                    | 259.1                       |
| LHISTD02                                                          | 210.8       | 214.0      | 214.3                 | 214.4                 | 214.4                    | 215.1                       |
|                                                                   | 132.6       | 136.3      | 137.5                 | 136.4                 | 137.3                    | 139.3                       |
| LHISTD13                                                          | 210.6       | 213.4      | 213.7                 | 213.8                 | 213.8                    | 214.6                       |
|                                                                   | 132.4       | 137.7      | 139.0                 | 137.7                 | 138.6                    | 140.7                       |
| TEJWAG                                                            | 143.9       | 145.0      | 146.3                 | 145.5                 | 146.3                    | 148.2                       |
| GLYCIN03                                                          | -6.5        | -18.4      | -18.4                 | -14.1                 | -13.0                    | -14.9                       |
| FUSVAQ01                                                          | 183.2       | 184.6      | 183.1                 | 182.7                 | 182.0                    | 185.1                       |
|                                                                   | 174.2       | 172.8      | 172.4                 | 171.6                 | 171.3                    | 174.0                       |
|                                                                   | 192.2       | 192.7      | 191.6                 | 193.1                 | 192.5                    | 189.8                       |
|                                                                   | 120.2       | 125.6      | 126.4                 | 123.9                 | 124.4                    | 126.9                       |
|                                                                   | 50.2        | 47.4       | 48.0                  | 48.7                  | 49.2                     | 47.6                        |
| CYTSIN                                                            | 110.2       | 115.2      | 115.8                 | 112.6                 | 112.1                    | 113.7                       |
|                                                                   | 165.2       | 165.7      | 164.8                 | 161.6                 | 160.2                    | 163.3                       |
|                                                                   | 54.2        | 48.0       | 48.1                  | 50.3                  | 51.1                     | 49.5                        |
| THYMIN01                                                          | 90.2        | 95.0       | 95.2                  | 92.2                  | 90.9                     | 90.7                        |
|                                                                   | 119.2       | 121.0      | 120.7                 | 117.5                 | 116.7                    | 118.3                       |
| URACIL                                                            | 96.2        | 105.2      | 105.2                 | 102.0                 | 100.6                    | 100.5                       |
|                                                                   | 120.2       | 121.3      | 120.9                 | 117.5                 | 116.6                    | 118.0                       |
| CIMETD                                                            | 130.5       | 135.0      | 136.0                 | 134.6                 | 135.4                    | 137.8                       |
|                                                                   | 213.1       | 214.6      | 214.8                 | 214.8                 | 214.7                    | 215.1                       |
|                                                                   | 56.6        | 56.7       | 56.2                  | 57.4                  | 57.5                     | 57.0                        |
|                                                                   | 43.5        | 40.6       | 38.8                  | 42.1                  | 42.0                     | 40.6                        |
|                                                                   | 45.8        | 39.6       | 38.6                  | 40.5                  | 40.1                     | 37.7                        |
|                                                                   | 149.9       | 145.0      | 143.7                 | 146.7                 | 145.8                    | 138.8                       |
| BAPLOT01                                                          | 114.7       | 123.5      | 121.4                 | 118.7                 | 116.8                    | 118.6                       |
|                                                                   | 72.7        | 78.7       | 77.1                  | 76.1                  | 74.4                     | 73.6                        |
|                                                                   | 122.7       | 128.0      | 129.8                 | 128.3                 | 129.3                    | 131.6                       |
|                                                                   | 178.7       | 180.2      | 178.9                 | 179.5                 | 179.0                    | 180.1                       |
| LTYRHC10                                                          | 8.0         | 12.1       | 12.9                  | 14.0                  | 14.6                     | 13.9                        |
| CYSCLM                                                            | 1.5         | -6.8       | -6.0                  | -3.2                  | -2.0                     | -3.4                        |
| <b>RMSE</b>                                                       |             | <b>5.8</b> | <b>5.6</b>            | <b>4.2</b>            | <b>4.0</b>               | <b>5.1</b>                  |

**Table S8:** Experimental and predicted values for the 35 chemical shifts (ppm) in the  $^{15}\text{N}$  benchmark dataset, as computed with GIPAW PBE and after monomer-correction with various functionals. The crystal structures were optimized with PBE0-D3(BJ).

| $^{15}\text{N}$ Chemical Shifts (ppm) using PBE0-D3(BJ) Structures |             |            |                       |                       |                          |                             |
|--------------------------------------------------------------------|-------------|------------|-----------------------|-----------------------|--------------------------|-----------------------------|
| RefCode                                                            | Expt. Shift | GIPAW PBE  | GIPAW + $\Delta$ TPSS | GIPAW + $\Delta$ PBE0 | GIPAW + $\Delta$ PBE0-DH | GIPAW + $\Delta$ DSD-PBEP86 |
| BITZAF                                                             | 249.5       | 244.6      | 244.8                 | 247.8                 | 248.8                    | 245.6                       |
| GEHHEH                                                             | 187.4       | 171.5      | 175.6                 | 174.3                 | 176.8                    | 179.2                       |
|                                                                    | 261.0       | 256.1      | 257.1                 | 259.9                 | 260.9                    | 259.5                       |
| GEHHIL                                                             | 268.5       | 270.0      | 269.4                 | 270.3                 | 270.0                    | 264.9                       |
|                                                                    | 261.2       | 264.5      | 262.5                 | 265.8                 | 265.6                    | 264.3                       |
| LHISTD02                                                           | 210.8       | 212.0      | 212.2                 | 212.5                 | 212.6                    | 213.2                       |
|                                                                    | 132.6       | 135.1      | 136.4                 | 135.3                 | 136.2                    | 138.1                       |
| LHISTD13                                                           | 210.6       | 211.4      | 211.6                 | 211.9                 | 212.0                    | 212.7                       |
|                                                                    | 132.4       | 136.4      | 137.8                 | 136.6                 | 137.5                    | 139.4                       |
| TEJWAG                                                             | 143.9       | 144.5      | 145.8                 | 145.0                 | 145.7                    | 147.6                       |
| GLYCIN03                                                           | -6.5        | -12.2      | -12.0                 | -8.5                  | -7.5                     | -9.0                        |
| FUSVAQ01                                                           | 183.2       | 182.7      | 181.4                 | 180.8                 | 180.1                    | 183.0                       |
|                                                                    | 174.2       | 172.0      | 171.8                 | 170.9                 | 170.6                    | 173.1                       |
|                                                                    | 192.2       | 191.1      | 190.3                 | 191.6                 | 191.1                    | 188.7                       |
|                                                                    | 120.2       | 125.4      | 126.1                 | 123.7                 | 124.1                    | 126.5                       |
|                                                                    | 50.2        | 48.8       | 49.3                  | 50.0                  | 50.5                     | 48.9                        |
| CYTSIN                                                             | 110.2       | 113.3      | 113.8                 | 110.9                 | 110.3                    | 111.7                       |
|                                                                    | 165.2       | 165.4      | 164.6                 | 161.5                 | 160.2                    | 163.1                       |
|                                                                    | 54.2        | 50.6       | 50.6                  | 52.6                  | 53.3                     | 51.8                        |
| THYMIN01                                                           | 90.2        | 94.2       | 94.4                  | 91.4                  | 90.1                     | 89.9                        |
|                                                                    | 119.2       | 120.3      | 120.0                 | 116.9                 | 116.0                    | 117.6                       |
| URACIL                                                             | 96.2        | 103.3      | 103.2                 | 100.3                 | 98.8                     | 98.7                        |
|                                                                    | 120.2       | 120.9      | 120.2                 | 117.2                 | 116.2                    | 117.6                       |
| CIMETD                                                             | 130.5       | 134.4      | 135.4                 | 134.0                 | 134.8                    | 137.1                       |
|                                                                    | 213.1       | 213.0      | 213.2                 | 213.2                 | 213.2                    | 213.7                       |
|                                                                    | 56.6        | 56.7       | 56.1                  | 57.3                  | 57.3                     | 56.8                        |
|                                                                    | 43.5        | 42.1       | 40.3                  | 43.3                  | 43.1                     | 41.8                        |
|                                                                    | 45.8        | 41.9       | 41.0                  | 42.7                  | 42.1                     | 39.9                        |
|                                                                    | 149.9       | 146.1      | 144.9                 | 147.7                 | 147.2                    | 141.4                       |
| BAPLOT01                                                           | 114.7       | 121.3      | 119.0                 | 116.9                 | 115.0                    | 116.4                       |
|                                                                    | 72.7        | 78.1       | 76.1                  | 75.4                  | 73.6                     | 72.5                        |
|                                                                    | 122.7       | 126.4      | 128.1                 | 127.0                 | 128.0                    | 129.9                       |
|                                                                    | 178.7       | 180.2      | 179.1                 | 179.9                 | 179.5                    | 180.4                       |
| LTYRHC10                                                           | 8.0         | 4.4        | 5.3                   | 7.1                   | 8.2                      | 7.6                         |
| CYSCLM                                                             | 1.5         | -1.9       | -1.0                  | 1.3                   | 2.4                      | 1.2                         |
| <b>RMSE</b>                                                        |             | <b>4.3</b> | <b>4.0</b>            | <b>3.3</b>            | <b>3.2</b>               | <b>3.8</b>                  |

## S2 Impact of variable unit cell crystal structure optimizations

The main results presented in this study employ crystal structures that were optimized with the lattice parameters constrained to their experimental values. This ensures that the optimizations effectively account for finite-temperature thermal expansion and leads to more accurate chemical shifts relative to experiment.<sup>1</sup> However, one might question whether constraining the lattice parameters artificially reduces the differences between the PBE-D3(BJ) and PBE0-D3(BJ) structures. This question is particularly relevant NMR crystallography problems where the experimental lattice parameters are not known *a priori*. Here, we investigate the impact of variable-cell crystal structure optimizations on the <sup>15</sup>N dataset chemical shifts.

Table S9 summarizes the root-mean-square errors for obtained with both fixed-cell and variable-cell geometry optimizations. For both the PBE-D3(BJ) and PBE0-D3(BJ) geometry optimizations, using the variable-cell optimizations increases the rms errors by 0.8–0.9 ppm. However, this change in the statistical errors is quite uniform and does not substantially alter the relative accuracy of the chemical shifts between the GGA and hybrid functional structures. The detailed variable-cell results underlying Table S9 are provided in the following sections.

**Table S9:** Summary of the root-mean-square chemical shift errors (ppm) for the <sup>15</sup>N test set using either fixed experimental lattice parameters or fully-optimized unit cells. The change in rms error due to allowing the unit cell parameters to relax is also indicated.

| Geometry                                               | Lattice Parameters | GIPAW PBE   | GIPAW + $\Delta$ TPSS | GIPAW + $\Delta$ PBE0 | GIPAW + $\Delta$ PBE0-DH | GIPAW + $\Delta$ DSD-PBEP86 |
|--------------------------------------------------------|--------------------|-------------|-----------------------|-----------------------|--------------------------|-----------------------------|
| PBE-D3(BJ)                                             | Fixed              | 5.8         | 5.6                   | 4.2                   | 4.0                      | 5.1                         |
| PBE-D3(BJ)                                             | Variable           | 6.6         | 6.6                   | 5.0                   | 4.6                      | 5.9                         |
| <b>Change: Fixed <math>\rightarrow</math> Variable</b> |                    | <b>+0.8</b> | <b>+1.0</b>           | <b>+0.8</b>           | <b>+0.6</b>              | <b>+0.7</b>                 |
| PBE0-D3(BJ)                                            | Fixed              | 4.3         | 4.0                   | 3.3                   | 3.2                      | 3.8                         |
| PBE0-D3(BJ)                                            | Variable           | 5.1         | 5.1                   | 4.2                   | 4.1                      | 4.7                         |
| <b>Change: Fixed <math>\rightarrow</math> Variable</b> |                    | <b>+0.8</b> | <b>+1.1</b>           | <b>+0.9</b>           | <b>+1.0</b>              | <b>+0.8</b>                 |

## S2.1 Comparison of variable-cell DFT and experimental crystal structures

Table S10 lists the rmsd15 errors for the variable-cell DFT-optimized crystal structures relative to the experimental ones. Hydrogen atoms were excluded from the rmsd15 comparison.

**Table S10:** The rmsd15 errors (Å) computed from overlays of the DFT-optimized and experimental crystal structures in the  $^{15}\text{N}$  test set (variable cell optimizations).

| RefCode     | PBE-D3(BJ)<br>Structures | PBE0-D3(BJ)<br>Structures |
|-------------|--------------------------|---------------------------|
| BAPLOT01    | 0.262                    | 0.268                     |
| BITZAF      | 0.209                    | 0.236                     |
| CIMETD      | 0.310                    | 0.334                     |
| CYSCLM11    | 0.242                    | 0.242                     |
| CYTSIN      | 0.180                    | 0.196                     |
| FUSVAQ01    | 0.161                    | 0.166                     |
| GEHHEH      | 0.460                    | 0.410                     |
| GEHHIL      | 0.635                    | 0.494                     |
| GLYCIN03    | 0.257                    | 0.254                     |
| LHISTD02    | 0.261                    | 0.284                     |
| LHISTD13    | 0.240                    | 0.262                     |
| LTYRHC10    | 0.233                    | 0.273                     |
| TEJWAG      | 0.170                    | 0.190                     |
| THYMIN01    | 1.156                    | 1.119                     |
| URACIL      | 0.169                    | 0.193                     |
| <b>Mean</b> | <b>0.330</b>             | <b>0.328</b>              |

**Note:** The variable-cell THYMIN01 structure changed significantly in the CRYSTAL17 geometry optimizations. The reason for this behavior is unclear, and it did not occur in any fixed-cell optimizations or in a variable-cell planewave DFT optimization of THYMIN01. Nevertheless, the errors in the chemical shifts remain within acceptable agreement of experiment (Tables S12 and S13) despite the structural changes. Since the variable cell structure optimizations are not the primary focus of the paper, this issue was not investigated further.



## S2.2 Nitrogen variable-cell predicted shifts

Tables S12 and S13 show the resulting experimental and predicted shifts as for the  $^{15}\text{N}$  data set computed with the PBE-D3(BJ) and PBE0-D3(BJ) variable unit cell structure optimizations, respectively. Table S11 lists the linear regression parameters that were fitted to map the computed absolute chemical shieldings to the chemical shifts listed in Tables S12 and S13.

**Table S11:**  $^{15}\text{N}$  linear regression parameters for structures optimized with variable unit cell parameters

| Structure Optimization | Chemical Shieldings   | Slope   | Intercept (ppm) |
|------------------------|-----------------------|---------|-----------------|
| PBE-D3(BJ)             | GIPAW PBE             | -0.9615 | 176.03          |
|                        | GIPAW + $\Delta$ PBE0 | -1.0162 | 186.24          |
| PBE0-D3(BJ)            | GIPAW PBE             | -0.9733 | 183.08          |
|                        | GIPAW + $\Delta$ PBE0 | -1.0239 | 193.03          |

**Table S12:** Experimental and predicted values for the 35 chemical shifts (ppm) in the  $^{15}\text{N}$  benchmark dataset, as computed with GIPAW PBE and after monomer-correction with PBE0. Both the atomic positions and lattice parameters were optimized with PBE-D3(BJ) for these structures.

| <b>PBE-D3(BJ) Variable Cell Structures</b> |                             |            |                       |
|--------------------------------------------|-----------------------------|------------|-----------------------|
| RefCode                                    | $^{15}\text{N}$ Expt. Shift | GIPAW PBE  | GIPAW + $\Delta$ PBE0 |
| BITZAF                                     | 249.5                       | 241.1      | 244.3                 |
| GEHHEH                                     | 187.4                       | 173.2      | 175.7                 |
|                                            | 261.0                       | 248.8      | 254.1                 |
| GEHHIL                                     | 268.5                       | 269.1      | 269.9                 |
|                                            | 261.2                       | 258.1      | 259.7                 |
| LHISTD02                                   | 210.8                       | 214.1      | 214.5                 |
|                                            | 132.6                       | 136.6      | 136.7                 |
| LHISTD13                                   | 210.6                       | 213.9      | 214.3                 |
|                                            | 132.4                       | 137.5      | 137.5                 |
| TEJWAG                                     | 143.9                       | 144.5      | 145.0                 |
| GLYCIN03                                   | -6.5                        | -20.1      | -15.8                 |
| FUSVAQ01                                   | 183.2                       | 180.8      | 179.0                 |
|                                            | 174.2                       | 171.0      | 169.8                 |
|                                            | 192.2                       | 190.9      | 191.5                 |
|                                            | 120.2                       | 130.5      | 128.5                 |
|                                            | 50.2                        | 50.9       | 52.0                  |
| CYTSIN                                     | 110.2                       | 116.4      | 113.7                 |
|                                            | 165.2                       | 163.5      | 159.4                 |
|                                            | 54.2                        | 50.4       | 52.5                  |
| THYMIN01                                   | 90.2                        | 97.3       | 94.3                  |
|                                            | 119.2                       | 122.8      | 119.3                 |
| URACIL                                     | 96.2                        | 107.9      | 104.6                 |
|                                            | 120.2                       | 121.0      | 117.2                 |
| CIMETD                                     | 130.5                       | 139.3      | 138.6                 |
|                                            | 213.1                       | 214.1      | 214.3                 |
|                                            | 56.6                        | 57.2       | 57.9                  |
|                                            | 43.5                        | 42.3       | 43.7                  |
|                                            | 45.8                        | 39.5       | 40.4                  |
|                                            | 149.9                       | 149.3      | 150.8                 |
| BAPLOT01                                   | 114.7                       | 123.9      | 119.0                 |
|                                            | 72.7                        | 78.7       | 76.1                  |
|                                            | 122.7                       | 129.8      | 130.0                 |
|                                            | 178.7                       | 178.9      | 178.3                 |
| LTYRHC10                                   | 8.0                         | -1.7       | 1.5                   |
| CYSCLM                                     | 1.5                         | -7.2       | -3.4                  |
| <b>RMSE</b>                                |                             | <b>6.6</b> | <b>5.0</b>            |

**Table S13:** Experimental and predicted values for the 35 chemical shifts (ppm) in the  $^{15}\text{N}$  benchmark dataset, as computed with GIPAW PBE and after monomer-correction with PBE0. Both the atomic positions and lattice parameters were optimized with PBE0-D3(BJ) for these structures.

| <b>PBE0-D3(BJ) Variable Cell Structures</b> |                             |            |                       |
|---------------------------------------------|-----------------------------|------------|-----------------------|
| RefCode                                     | $^{15}\text{N}$ Expt. Shift | GIPAW PBE  | GIPAW + $\Delta$ PBE0 |
| BITZAF                                      | 249.5                       | 243.7      | 246.7                 |
| GEHHEH                                      | 187.4                       | 172.0      | 174.5                 |
|                                             | 261.0                       | 258.0      | 262.2                 |
| GEHHIL                                      | 268.5                       | 268.4      | 268.9                 |
|                                             | 261.2                       | 262.3      | 263.7                 |
| LHISTD02                                    | 210.8                       | 212.3      | 212.8                 |
|                                             | 132.6                       | 136.0      | 136.2                 |
| LHISTD13                                    | 210.6                       | 212.3      | 212.9                 |
|                                             | 132.4                       | 136.8      | 136.9                 |
| TEJWAG                                      | 143.9                       | 143.5      | 144.1                 |
| GLYCIN03                                    | -6.5                        | -15.8      | -12.0                 |
| FUSVAQ01                                    | 183.2                       | 179.0      | 177.1                 |
|                                             | 174.2                       | 170.0      | 169.0                 |
|                                             | 192.2                       | 189.8      | 190.4                 |
|                                             | 120.2                       | 129.0      | 127.2                 |
|                                             | 50.2                        | 50.7       | 51.8                  |
| CYTSIN                                      | 110.2                       | 113.7      | 111.2                 |
|                                             | 165.2                       | 162.9      | 159.1                 |
|                                             | 54.2                        | 52.5       | 54.4                  |
| THYMIN01                                    | 90.2                        | 96.0       | 93.2                  |
|                                             | 119.2                       | 121.7      | 118.1                 |
| URACIL                                      | 96.2                        | 105.7      | 102.6                 |
|                                             | 120.2                       | 120.1      | 116.3                 |
| CIMETD                                      | 130.5                       | 138.5      | 138.0                 |
|                                             | 213.1                       | 212.9      | 213.2                 |
|                                             | 56.6                        | 56.0       | 56.6                  |
|                                             | 43.5                        | 42.2       | 43.5                  |
|                                             | 45.8                        | 40.9       | 41.7                  |
|                                             | 149.9                       | 150.3      | 151.8                 |
| BAPLOT01                                    | 114.7                       | 121.4      | 116.8                 |
|                                             | 72.7                        | 77.2       | 74.5                  |
|                                             | 122.7                       | 127.7      | 128.1                 |
|                                             | 178.7                       | 178.8      | 178.3                 |
| LTYRHC10                                    | 8.0                         | 2.1        | 5.0                   |
| CYSCLM                                      | 1.5                         | -4.0       | -0.5                  |
| <b>RMSE</b>                                 |                             | <b>5.1</b> | <b>4.2</b>            |

## S3 NMR crystallography case studies

The chemical shifts for all carbon and nitrogen sets for the testosterone, acetaminophen, and phenobarbital crystalline structures are listed below. For phenobarbital, only  $^{15}\text{N}$  chemical shifts are discussed in the main paper, but the  $^{13}\text{C}$  chemical shifts are included here for completeness. The molecule naming and atomic numbering schemes used for these crystals can be found in ref 3.

### S3.1 Testosterone

**Table S14:** Experimental and predicted  $^{13}\text{C}$  chemical shifts for  $\alpha$  and  $\beta$  testosterone, using crystal structures optimized with PBE-D3(BJ).

| Testosterone Chemical Shifts (ppm) using PBE-D3(BJ) Structures                                      |             |           |                       |                       |                          |                             |
|-----------------------------------------------------------------------------------------------------|-------------|-----------|-----------------------|-----------------------|--------------------------|-----------------------------|
| $^{13}\text{C}$ Chemical shifts for all polymorphic forms of testosterone optimized with PBE-D3(BJ) |             |           |                       |                       |                          |                             |
| Atom                                                                                                | Expt. Shift | GIPAW PBE | GIPAW + $\Delta$ TPSS | GIPAW + $\Delta$ PBE0 | GIPAW + $\Delta$ PBE0-DH | GIPAW + $\Delta$ DSD-PBEP86 |
| $\alpha$ -Testosterone ( $Z' = 2$ ): Molecule <i>u</i>                                              |             |           |                       |                       |                          |                             |
| C1                                                                                                  | 36.2        | 34.2      | 35.7                  | 36.0                  | 36.5                     | 35.7                        |
| C2                                                                                                  | 34.6        | 30.7      | 31.6                  | 33.2                  | 33.6                     | 31.8                        |
| C3                                                                                                  | 201.2       | 206.4     | 204.8                 | 204.8                 | 203.6                    | 203.2                       |
| C4                                                                                                  | 125.7       | 124.9     | 123.8                 | 123.8                 | 123.7                    | 124.2                       |
| C5                                                                                                  | 170.6       | 180.9     | 180.4                 | 178.3                 | 176.1                    | 173.4                       |
| C6                                                                                                  | 33.8        | 32.5      | 34.1                  | 34.1                  | 34.2                     | 32.5                        |
| C7                                                                                                  | 32.4        | 31.7      | 32.9                  | 33.3                  | 33.7                     | 32.7                        |
| C8                                                                                                  | 36.9        | 33.5      | 34.5                  | 34.6                  | 34.8                     | 34.2                        |
| C9                                                                                                  | 54.1        | 54.1      | 53.7                  | 52.9                  | 52.5                     | 53.1                        |
| C10                                                                                                 | 40.0        | 39.8      | 40.1                  | 40.5                  | 40.2                     | 39.2                        |
| C11                                                                                                 | 23.0        | 17.9      | 19.7                  | 21.1                  | 21.8                     | 19.9                        |
| C12                                                                                                 | 36.8        | 35.0      | 36.8                  | 36.6                  | 36.9                     | 36.0                        |
| C13                                                                                                 | 43.7        | 41.0      | 39.9                  | 42.2                  | 42.4                     | 41.7                        |
| C14                                                                                                 | 51.1        | 50.2      | 50.3                  | 50.2                  | 50.2                     | 50.4                        |
| C15                                                                                                 | 24.3        | 21.0      | 23.0                  | 24.2                  | 24.9                     | 23.0                        |
| C16                                                                                                 | 30.2        | 25.5      | 26.8                  | 27.9                  | 28.4                     | 26.8                        |
| C17                                                                                                 | 80.4        | 86.0      | 85.6                  | 83.0                  | 82.1                     | 83.6                        |
| C18                                                                                                 | 11.7        | 6.2       | 9.7                   | 11.7                  | 13.2                     | 10.6                        |
| C19                                                                                                 | 18.6        | 10.8      | 13.4                  | 15.5                  | 16.8                     | 14.5                        |
| $\alpha$ -Testosterone ( $Z' = 2$ ): Molecule <i>v</i>                                              |             |           |                       |                       |                          |                             |
| C1                                                                                                  | 37.2        | 33.7      | 35.1                  | 35.5                  | 35.9                     | 35.0                        |
| C2                                                                                                  | 33.8        | 33.0      | 33.9                  | 35.3                  | 35.5                     | 33.8                        |
| C3                                                                                                  | 202.7       | 206.1     | 204.5                 | 204.4                 | 203.2                    | 202.7                       |
| C4                                                                                                  | 125.2       | 124.0     | 122.9                 | 122.9                 | 122.7                    | 123.2                       |
| C5                                                                                                  | 172.1       | 181.5     | 181.1                 | 178.9                 | 176.7                    | 174.0                       |
| C6                                                                                                  | 33.5        | 33.2      | 34.7                  | 34.7                  | 34.8                     | 33.0                        |
| C7                                                                                                  | 32.3        | 30.7      | 31.9                  | 32.2                  | 32.6                     | 31.5                        |
| C8                                                                                                  | 36.4        | 34.5      | 35.3                  | 35.6                  | 35.8                     | 35.2                        |
| C9                                                                                                  | 55.3        | 53.1      | 52.8                  | 52.2                  | 51.8                     | 52.2                        |
| C10                                                                                                 | 39.6        | 40.1      | 40.2                  | 40.7                  | 40.5                     | 39.5                        |
| C11                                                                                                 | 22.0        | 19.6      | 21.5                  | 22.6                  | 23.2                     | 21.3                        |
| C12                                                                                                 | 38.4        | 33.5      | 35.3                  | 35.3                  | 35.6                     | 34.5                        |
| C13                                                                                                 | 43.6        | 41.4      | 40.0                  | 42.4                  | 42.6                     | 41.8                        |
| C14                                                                                                 | 51.9        | 49.6      | 49.8                  | 49.6                  | 49.4                     | 49.4                        |
| C15                                                                                                 | 24.2        | 21.0      | 23.0                  | 24.3                  | 25.1                     | 23.1                        |
| C16                                                                                                 | 29.9        | 26.6      | 28.2                  | 29.5                  | 30.3                     | 28.7                        |
| C17                                                                                                 | 82.7        | 82.6      | 82.2                  | 79.8                  | 79.0                     | 80.3                        |
| C18                                                                                                 | 12.2        | 5.6       | 9.0                   | 11.1                  | 12.6                     | 9.8                         |
| C19                                                                                                 | 17.9        | 15.3      | 17.9                  | 19.7                  | 21.0                     | 18.9                        |
| $\beta$ -Testosterone                                                                               |             |           |                       |                       |                          |                             |

Continued on next page

| Testosterone Chemical Shifts (ppm) using PBE-D3(BJ) Structures ( <i>continued</i> ) |             |            |                       |                       |                          |                             |
|-------------------------------------------------------------------------------------|-------------|------------|-----------------------|-----------------------|--------------------------|-----------------------------|
| Atom                                                                                | Expt. Shift | GIPAW PBE  | GIPAW + $\Delta$ TPSS | GIPAW + $\Delta$ PBE0 | GIPAW + $\Delta$ PBE0-DH | GIPAW + $\Delta$ DSD-PBEP86 |
| C1                                                                                  | 35.3        | 32.8       | 34.3                  | 34.7                  | 35.2                     | 34.4                        |
| C2                                                                                  | 35.3        | 32.5       | 33.5                  | 34.9                  | 35.3                     | 33.7                        |
| C3                                                                                  | 200.2       | 204.2      | 202.5                 | 202.7                 | 201.6                    | 201.0                       |
| C4                                                                                  | 124.7       | 125.4      | 124.3                 | 124.3                 | 124.1                    | 124.6                       |
| C5                                                                                  | 173.8       | 185.1      | 184.7                 | 182.2                 | 180.2                    | 177.6                       |
| C6                                                                                  | 33.5        | 32.8       | 34.4                  | 34.4                  | 34.5                     | 32.7                        |
| C7                                                                                  | 33.5        | 32.9       | 34.1                  | 34.1                  | 34.4                     | 33.3                        |
| C8                                                                                  | 35.3        | 32.8       | 33.7                  | 33.9                  | 34.1                     | 33.4                        |
| C9                                                                                  | 54.7        | 54.4       | 53.9                  | 53.2                  | 52.8                     | 53.3                        |
| C10                                                                                 | 39.4        | 40.0       | 40.2                  | 40.6                  | 40.4                     | 39.3                        |
| C11                                                                                 | 21.0        | 17.5       | 19.4                  | 20.6                  | 21.3                     | 19.3                        |
| C12                                                                                 | 35.3        | 33.3       | 35.2                  | 35.2                  | 35.6                     | 34.5                        |
| C13                                                                                 | 43.6        | 42.0       | 40.7                  | 43.0                  | 43.2                     | 42.6                        |
| C14                                                                                 | 51.6        | 50.4       | 50.6                  | 50.3                  | 50.3                     | 50.5                        |
| C15                                                                                 | 24.0        | 21.0       | 23.1                  | 24.3                  | 25.0                     | 23.1                        |
| C16                                                                                 | 28.8        | 25.5       | 27.1                  | 28.4                  | 29.0                     | 27.2                        |
| C17                                                                                 | 80.7        | 84.0       | 83.7                  | 81.2                  | 80.4                     | 81.8                        |
| C18                                                                                 | 12.6        | 6.9        | 10.4                  | 12.4                  | 13.9                     | 11.2                        |
| C19                                                                                 | 16.9        | 12.0       | 14.8                  | 16.7                  | 18.0                     | 15.7                        |
| <b><math>^{13}\text{C}</math> RMSE</b>                                              |             | <b>3.9</b> | <b>3.1</b>            | <b>2.3</b>            | <b>1.9</b>               | <b>1.8</b>                  |

**Table S15:** Experimental and predicted  $^{13}\text{C}$  chemical shifts for  $\alpha$  and  $\beta$  testosterone, using crystal structures optimized with PBE0-D3(BJ).

| Testosterone Chemical Shifts (ppm) using PBE0-D3(BJ) Structures |             |           |                       |                       |                          |                             |
|-----------------------------------------------------------------|-------------|-----------|-----------------------|-----------------------|--------------------------|-----------------------------|
| Atom                                                            | Expt. Shift | GIPAW PBE | GIPAW + $\Delta$ TPSS | GIPAW + $\Delta$ PBE0 | GIPAW + $\Delta$ PBE0-DH | GIPAW + $\Delta$ DSD-PBEP86 |
| $\alpha$ -Testosterone ( $Z' = 2$ ): Molecule <i>u</i>          |             |           |                       |                       |                          |                             |
| C1                                                              | 36.2        | 35.2      | 36.7                  | 36.9                  | 37.3                     | 36.6                        |
| C2                                                              | 34.6        | 31.7      | 32.4                  | 33.9                  | 34.3                     | 32.6                        |
| C3                                                              | 201.2       | 205.8     | 204.1                 | 204.0                 | 202.9                    | 202.4                       |
| C4                                                              | 125.7       | 126.1     | 125.0                 | 125.0                 | 124.8                    | 125.3                       |
| C5                                                              | 170.6       | 180.9     | 180.4                 | 178.3                 | 176.2                    | 173.7                       |
| C6                                                              | 33.8        | 33.4      | 34.9                  | 34.8                  | 34.9                     | 33.3                        |
| C7                                                              | 32.4        | 32.5      | 33.6                  | 33.8                  | 34.2                     | 33.3                        |
| C8                                                              | 36.9        | 34.1      | 35.0                  | 35.1                  | 35.2                     | 34.6                        |
| C9                                                              | 54.1        | 54.8      | 54.5                  | 53.6                  | 53.2                     | 53.8                        |
| C10                                                             | 40.0        | 39.6      | 39.8                  | 40.2                  | 39.9                     | 38.9                        |
| C11                                                             | 23.0        | 18.5      | 20.3                  | 21.5                  | 22.2                     | 20.4                        |
| C12                                                             | 36.8        | 36.0      | 37.8                  | 37.4                  | 37.7                     | 36.8                        |
| C13                                                             | 43.7        | 41.0      | 39.8                  | 42.1                  | 42.3                     | 41.7                        |
| C14                                                             | 51.1        | 51.1      | 51.2                  | 50.9                  | 50.9                     | 51.2                        |
| C15                                                             | 24.3        | 21.4      | 23.3                  | 24.4                  | 25.1                     | 23.3                        |
| C16                                                             | 30.2        | 26.3      | 27.5                  | 28.5                  | 29.0                     | 27.5                        |
| C17                                                             | 80.4        | 85.8      | 85.4                  | 83.0                  | 82.1                     | 83.6                        |
| C18                                                             | 11.7        | 7.1       | 10.5                  | 12.3                  | 13.8                     | 11.3                        |
| C19                                                             | 18.6        | 11.7      | 14.3                  | 16.2                  | 17.5                     | 15.3                        |
| $\alpha$ -Testosterone ( $Z' = 2$ ): Molecule <i>v</i>          |             |           |                       |                       |                          |                             |
| C1                                                              | 37.2        | 34.8      | 36.2                  | 36.4                  | 36.7                     | 35.9                        |
| C2                                                              | 33.8        | 33.6      | 34.4                  | 35.7                  | 35.9                     | 34.3                        |
| C3                                                              | 202.7       | 205.8     | 204.2                 | 204.0                 | 202.8                    | 202.3                       |
| C4                                                              | 125.2       | 125.2     | 124.0                 | 124.1                 | 123.9                    | 124.3                       |
| C5                                                              | 172.1       | 181.8     | 181.3                 | 179.1                 | 177.0                    | 174.5                       |
| C6                                                              | 33.5        | 34.2      | 35.6                  | 35.4                  | 35.5                     | 33.9                        |
| C7                                                              | 32.3        | 31.4      | 32.6                  | 32.8                  | 33.2                     | 32.2                        |
| C8                                                              | 36.4        | 35.0      | 35.9                  | 36.0                  | 36.2                     | 35.7                        |
| C9                                                              | 55.3        | 54.0      | 53.7                  | 52.9                  | 52.5                     | 53.0                        |
| C10                                                             | 39.6        | 39.8      | 37.5                  | 40.4                  | 40.1                     | 39.1                        |

*Continued on next page*

Testosterone Chemical Shifts (ppm) using PBE0-D3(BJ) Structures (*continued*)

| Atom                                   | Expt. Shift | GIPAW PBE  | GIPAW + $\Delta$ TPSS | GIPAW + $\Delta$ PBE0 | GIPAW + $\Delta$ PBE0-DH | GIPAW + $\Delta$ DSD-PBEP86 |
|----------------------------------------|-------------|------------|-----------------------|-----------------------|--------------------------|-----------------------------|
| C11                                    | 22.0        | 20.1       | 21.9                  | 22.9                  | 23.5                     | 21.7                        |
| C12                                    | 38.4        | 34.6       | 36.4                  | 36.1                  | 36.4                     | 35.4                        |
| C13                                    | 43.6        | 41.4       | 40.0                  | 42.4                  | 42.5                     | 41.8                        |
| C14                                    | 51.9        | 50.5       | 50.7                  | 50.3                  | 50.1                     | 50.2                        |
| C15                                    | 24.2        | 21.4       | 23.3                  | 24.5                  | 25.3                     | 23.5                        |
| C16                                    | 29.9        | 27.5       | 29.1                  | 30.3                  | 31.0                     | 29.5                        |
| C17                                    | 82.7        | 82.5       | 82.2                  | 79.8                  | 79.1                     | 80.3                        |
| C18                                    | 12.2        | 6.6        | 9.9                   | 11.8                  | 13.2                     | 10.7                        |
| C19                                    | 17.9        | 16.1       | 18.7                  | 20.3                  | 21.6                     | 19.6                        |
| <i><math>\beta</math>-Testosterone</i> |             |            |                       |                       |                          |                             |
| C1                                     | 35.3        | 33.9       | 35.3                  | 35.6                  | 36.0                     | 35.3                        |
| C2                                     | 35.3        | 33.2       | 34.1                  | 35.4                  | 35.8                     | 34.3                        |
| C3                                     | 200.2       | 203.9      | 202.2                 | 202.3                 | 201.2                    | 200.7                       |
| C4                                     | 124.7       | 126.5      | 125.3                 | 125.4                 | 125.1                    | 125.6                       |
| C5                                     | 173.8       | 185.0      | 184.6                 | 182.1                 | 180.1                    | 177.7                       |
| C6                                     | 33.5        | 33.7       | 35.3                  | 35.1                  | 35.1                     | 33.5                        |
| C7                                     | 33.5        | 33.6       | 34.7                  | 34.7                  | 35.0                     | 34.0                        |
| C8                                     | 35.3        | 33.4       | 34.4                  | 34.4                  | 34.6                     | 33.9                        |
| C9                                     | 54.7        | 54.9       | 54.5                  | 53.6                  | 53.2                     | 53.9                        |
| C10                                    | 39.4        | 39.8       | 39.9                  | 40.3                  | 40.1                     | 39.0                        |
| C11                                    | 21.0        | 18.0       | 19.8                  | 20.9                  | 21.6                     | 19.7                        |
| C12                                    | 35.3        | 34.4       | 36.2                  | 36.0                  | 36.3                     | 35.4                        |
| C13                                    | 43.6        | 42.0       | 40.6                  | 42.9                  | 43.1                     | 42.5                        |
| C14                                    | 51.6        | 51.1       | 51.4                  | 50.9                  | 50.9                     | 51.1                        |
| C15                                    | 24.0        | 21.4       | 23.5                  | 24.5                  | 25.2                     | 23.4                        |
| C16                                    | 28.8        | 26.0       | 27.6                  | 28.7                  | 29.3                     | 27.6                        |
| C17                                    | 80.7        | 83.9       | 83.6                  | 81.2                  | 80.4                     | 81.7                        |
| C18                                    | 12.6        | 7.7        | 11.0                  | 12.9                  | 14.3                     | 11.8                        |
| C19                                    | 16.9        | 12.9       | 15.6                  | 17.3                  | 18.6                     | 16.5                        |
| <sup>13</sup> C RMSE                   |             | <b>3.5</b> | <b>2.9</b>            | <b>2.2</b>            | <b>1.9</b>               | <b>1.5</b>                  |

## S3.2 Acetaminophen

**Table S16:** Experimental and predicted  $^{13}\text{C}$  and  $^{15}\text{N}$  chemical shifts (ppm) for three polymorphs of acetaminophen, using crystal structures optimized with PBE-D3(BJ).

| Acetaminophen Chemical Shifts (ppm) using PBE-D3(BJ) Structures |             |            |                       |                       |                          |                             |
|-----------------------------------------------------------------|-------------|------------|-----------------------|-----------------------|--------------------------|-----------------------------|
| Atom                                                            | Expt. Shift | GIPAW PBE  | GIPAW + $\Delta$ TPSS | GIPAW + $\Delta$ PBE0 | GIPAW + $\Delta$ PBE0-DH | GIPAW + $\Delta$ DSD-PBEP86 |
| <b>Form I</b>                                                   |             |            |                       |                       |                          |                             |
| C1                                                              | 132.6       | 131.2      | 131.2                 | 131.5                 | 131.8                    | 132.4                       |
| C2                                                              | 123.1       | 121.7      | 121.5                 | 123.1                 | 123.5                    | 122.5                       |
| C3                                                              | 115.3       | 113.5      | 112.8                 | 115.3                 | 116.0                    | 114.9                       |
| C4                                                              | 152.0       | 153.4      | 152.5                 | 151.4                 | 151.1                    | 152.5                       |
| C5                                                              | 116.1       | 115.8      | 115.1                 | 117.0                 | 117.5                    | 116.7                       |
| C6                                                              | 120.3       | 117.6      | 117.1                 | 118.9                 | 119.2                    | 118.0                       |
| C7                                                              | 169.4       | 168.3      | 168.5                 | 170.3                 | 170.7                    | 170.3                       |
| C8                                                              | 23.5        | 19.2       | 21.1                  | 24.0                  | 25.3                     | 22.9                        |
| N1                                                              | 97.9        | 101.7      | 102.0                 | 98.3                  | 97.0                     | 97.1                        |
| <b>Form II</b>                                                  |             |            |                       |                       |                          |                             |
| C1                                                              | 131.6       | 130.3      | 130.3                 | 130.6                 | 130.9                    | 131.6                       |
| C2                                                              | 120.2       | 119.1      | 119.1                 | 120.7                 | 121.2                    | 119.9                       |
| C3                                                              | 117.1       | 115.9      | 115.4                 | 117.7                 | 118.3                    | 117.3                       |
| C4                                                              | 153.2       | 155.0      | 154.3                 | 153.1                 | 152.8                    | 154.3                       |
| C5                                                              | 118.4       | 116.7      | 116.2                 | 117.8                 | 118.4                    | 117.7                       |
| C6                                                              | 120.2       | 118.8      | 118.4                 | 120.0                 | 120.3                    | 119.1                       |
| C7                                                              | 170.6       | 169.1      | 169.3                 | 171.0                 | 171.4                    | 170.9                       |
| C8                                                              | 25.1        | 20.9       | 22.7                  | 25.7                  | 27.1                     | 24.7                        |
| N1                                                              | 98.3        | 104.3      | 104.8                 | 101.0                 | 99.6                     | 100.1                       |
| <b>Form III (<math>Z' = 2</math>)</b>                           |             |            |                       |                       |                          |                             |
| C1                                                              | 131.1       | 129.2      | 129.0                 | 129.5                 | 129.8                    | 130.4                       |
| C2                                                              | 124.8       | 124.2      | 123.7                 | 125.5                 | 126.0                    | 124.9                       |
| C3                                                              | 118.3       | 116.7      | 116.1                 | 118.4                 | 119.0                    | 118.1                       |
| C4                                                              | 151.9       | 153.1      | 152.2                 | 151.3                 | 150.8                    | 152.2                       |
| C5                                                              | 118.3       | 116.9      | 116.2                 | 117.9                 | 118.3                    | 117.6                       |
| C6                                                              | 123.2       | 122.0      | 121.5                 | 123.2                 | 123.6                    | 122.4                       |
| C7                                                              | 170.0       | 168.9      | 169.0                 | 170.9                 | 171.2                    | 170.5                       |
| C8                                                              | 24.3        | 19.2       | 21.2                  | 24.1                  | 25.5                     | 23.0                        |
| N1                                                              | 96.3        | 98.2       | 98.1                  | 94.7                  | 93.5                     | 93.5                        |
| C1'                                                             | 131.1       | 129.6      | 129.4                 | 130.0                 | 130.3                    | 131.1                       |
| C2'                                                             | 124.8       | 121.4      | 121.0                 | 122.8                 | 123.2                    | 122.0                       |
| C3'                                                             | 118.3       | 116.5      | 115.9                 | 118.1                 | 118.7                    | 117.7                       |
| C4'                                                             | 151.9       | 153.4      | 152.5                 | 151.5                 | 151.0                    | 152.3                       |
| C5'                                                             | 118.3       | 117.5      | 116.9                 | 118.6                 | 119.0                    | 118.3                       |
| C6'                                                             | 123.2       | 120.6      | 120.0                 | 121.7                 | 122.1                    | 121.1                       |
| C7'                                                             | 170.0       | 168.4      | 168.5                 | 170.4                 | 170.8                    | 170.0                       |
| C8'                                                             | 24.3        | 19.3       | 21.2                  | 24.1                  | 25.4                     | 23.0                        |
| N1'                                                             | 95.0        | 97.6       | 97.5                  | 94.3                  | 92.9                     | 92.8                        |
| $^{13}\text{C}$ RMSE                                            |             | <b>2.2</b> | <b>2.0</b>            | <b>0.8</b>            | <b>1.1</b>               | <b>1.0</b>                  |
| $^{15}\text{N}$ RMSE                                            |             | <b>3.9</b> | <b>4.1</b>            | <b>1.6</b>            | <b>1.9</b>               | <b>2.0</b>                  |

**Table S17:** Experimental and predicted  $^{13}\text{C}$  and  $^{15}\text{N}$  chemical shifts (ppm) for three polymorphs of acetaminophen, using crystal structures optimized with PBE0-D3(BJ).

| <b>Acetaminophen Chemical Shifts (ppm) using PBE0-D3(BJ) Structures</b> |             |            |                       |                       |                          |                             |
|-------------------------------------------------------------------------|-------------|------------|-----------------------|-----------------------|--------------------------|-----------------------------|
| Atom                                                                    | Expt. Shift | GIPAW PBE  | GIPAW + $\Delta$ TPSS | GIPAW + $\Delta$ PBE0 | GIPAW + $\Delta$ PBE0-DH | GIPAW + $\Delta$ DSD-PBEP86 |
| <b>Form I</b>                                                           |             |            |                       |                       |                          |                             |
| C1                                                                      | 132.6       | 131.6      | 131.5                 | 131.9                 | 132.2                    | 132.7                       |
| C2                                                                      | 123.1       | 123.2      | 122.9                 | 124.6                 | 125.0                    | 123.9                       |
| C3                                                                      | 115.3       | 114.6      | 113.9                 | 116.3                 | 117.0                    | 115.9                       |
| C4                                                                      | 152.0       | 153.7      | 152.8                 | 151.9                 | 151.7                    | 153.0                       |
| C5                                                                      | 116.1       | 116.9      | 116.2                 | 118.0                 | 118.5                    | 117.7                       |
| C6                                                                      | 120.3       | 119.0      | 118.3                 | 120.2                 | 120.5                    | 119.3                       |
| C7                                                                      | 169.4       | 167.5      | 167.5                 | 169.3                 | 169.7                    | 169.4                       |
| C8                                                                      | 23.5        | 19.2       | 20.9                  | 23.8                  | 25.2                     | 22.8                        |
| N1                                                                      | 97.9        | 100.8      | 101.0                 | 97.6                  | 96.2                     | 96.3                        |
| <b>Form II</b>                                                          |             |            |                       |                       |                          |                             |
| C1                                                                      | 131.6       | 130.8      | 130.7                 | 131.1                 | 131.3                    | 131.8                       |
| C2                                                                      | 120.2       | 120.6      | 120.3                 | 122.1                 | 122.5                    | 121.2                       |
| C3                                                                      | 117.1       | 116.9      | 116.3                 | 118.4                 | 119.0                    | 118.1                       |
| C4                                                                      | 153.2       | 155.3      | 154.5                 | 153.5                 | 153.2                    | 154.6                       |
| C5                                                                      | 118.4       | 117.8      | 117.1                 | 118.9                 | 119.3                    | 118.6                       |
| C6                                                                      | 120.2       | 120.3      | 119.7                 | 121.5                 | 121.8                    | 120.6                       |
| C7                                                                      | 170.6       | 168.6      | 168.7                 | 170.3                 | 170.6                    | 170.3                       |
| C8                                                                      | 25.1        | 21.6       | 23.4                  | 26.1                  | 27.4                     | 25.1                        |
| N1                                                                      | 98.3        | 101.7      | 101.9                 | 98.5                  | 97.3                     | 97.5                        |
| <b>Form III (<math>Z' = 2</math>)</b>                                   |             |            |                       |                       |                          |                             |
| C1                                                                      | 131.1       | 130.0      | 129.8                 | 130.3                 | 130.6                    | 131.1                       |
| C2                                                                      | 124.8       | 125.3      | 124.8                 | 126.6                 | 127.0                    | 126.0                       |
| C3                                                                      | 118.3       | 118.0      | 117.3                 | 119.5                 | 120.1                    | 119.2                       |
| C4                                                                      | 151.9       | 153.7      | 152.8                 | 152.0                 | 151.5                    | 152.9                       |
| C5                                                                      | 118.3       | 118.0      | 117.2                 | 118.9                 | 119.3                    | 118.6                       |
| C6                                                                      | 123.2       | 123.3      | 122.7                 | 124.4                 | 124.8                    | 123.6                       |
| C7                                                                      | 170.0       | 168.3      | 168.4                 | 170.1                 | 170.4                    | 170.0                       |
| C8                                                                      | 24.3        | 20.2       | 22.0                  | 24.8                  | 26.2                     | 23.8                        |
| N1                                                                      | 96.3        | 98.1       | 97.9                  | 94.7                  | 93.5                     | 93.5                        |
| C1'                                                                     | 131.1       | 130.3      | 130.1                 | 130.7                 | 131.0                    | 131.7                       |
| C2'                                                                     | 124.8       | 122.5      | 122.1                 | 123.9                 | 124.3                    | 123.1                       |
| C3'                                                                     | 118.3       | 117.4      | 116.8                 | 119.0                 | 119.5                    | 118.5                       |
| C4'                                                                     | 151.9       | 154.0      | 153.0                 | 152.1                 | 151.7                    | 153.0                       |
| C5'                                                                     | 118.3       | 118.4      | 117.7                 | 119.5                 | 119.8                    | 119.1                       |
| C6'                                                                     | 123.2       | 121.9      | 121.2                 | 123.0                 | 123.3                    | 122.3                       |
| C7'                                                                     | 170.0       | 168.0      | 168.0                 | 169.8                 | 170.2                    | 169.6                       |
| C8'                                                                     | 24.3        | 20.1       | 21.9                  | 24.7                  | 26.0                     | 23.8                        |
| N1'                                                                     | 95.0        | 97.5       | 97.4                  | 94.3                  | 93.0                     | 92.8                        |
| <b><math>^{13}\text{C}</math> RMSE</b>                                  |             | <b>1.8</b> | <b>1.4</b>            | <b>0.9</b>            | <b>1.3</b>               | <b>0.8</b>                  |
| <b><math>^{15}\text{N}</math> RMSE</b>                                  |             | <b>2.7</b> | <b>2.8</b>            | <b>0.9</b>            | <b>2.0</b>               | <b>2.0</b>                  |



### S3.3 Phenobarbital

**Table S18:** Experimental and predicted  $^{13}\text{C}$  and  $^{15}\text{N}$  chemical shifts (ppm) for two polymorphs of phenobarbital, using crystal structures optimized with PBE-D3(BJ).

| Phenobarbital Chemical Shifts (ppm) using PBE-D3(BJ) Structures |             |           |                       |                       |                          |                             |
|-----------------------------------------------------------------|-------------|-----------|-----------------------|-----------------------|--------------------------|-----------------------------|
| Atom                                                            | Expt. Shift | GIPAW PBE | GIPAW + $\Delta$ TPSS | GIPAW + $\Delta$ PBE0 | GIPAW + $\Delta$ PBE0-DH | GIPAW + $\Delta$ DSD-PBEP86 |
| <b>Form II (<math>Z' = 3</math>): Molecule A</b>                |             |           |                       |                       |                          |                             |
| C1                                                              | 147.2       | 146.3     | 146.5                 | 147.2                 | 147.7                    | 147.8                       |
| C2                                                              | 136.0       | 138.2     | 137.2                 | 136.3                 | 135.6                    | 136.2                       |
| C3                                                              | 61.7        | 63.3      | 64.6                  | 62.8                  | 62.1                     | 61.5                        |
| C4                                                              | 30.4        | 31.9      | 32.7                  | 33.2                  | 33.3                     | 31.8                        |
| C5                                                              | 6.9         | 1.6       | 3.9                   | 7.0                   | 8.4                      | 5.5                         |
| C6                                                              | 177.4       | 177.7     | 177.6                 | 177.2                 | 176.6                    | 175.9                       |
| C7                                                              | 177.4       | 180.0     | 180.1                 | 179.6                 | 179.2                    | 178.9                       |
| C8                                                              | 125.8       | 128.7     | 128.5                 | 128.9                 | 128.9                    | 127.7                       |
| C9                                                              | 131.4       | 130.7     | 129.6                 | 130.9                 | 131.0                    | 130.5                       |
| C10                                                             | 132.4       | 131.5     | 130.7                 | 132.1                 | 132.3                    | 131.5                       |
| C11                                                             | 132.8       | 130.2     | 129.2                 | 130.5                 | 130.7                    | 130.2                       |
| C12                                                             | 129.7       | 126.4     | 126.0                 | 127.3                 | 127.5                    | 126.3                       |
| N                                                               | 116.1       | 125.0     | 124.6                 | 120.5                 | 119.2                    | 120.6                       |
| N                                                               | 111.5       | 117.6     | 117.1                 | 114.0                 | 112.8                    | 113.8                       |
| <b>Form II (<math>Z' = 3</math>): Molecule B</b>                |             |           |                       |                       |                          |                             |
| C1                                                              | 148.9       | 147.7     | 148.1                 | 148.8                 | 149.4                    | 149.5                       |
| C2                                                              | 137.2       | 139.5     | 138.4                 | 137.4                 | 136.7                    | 137.3                       |
| C3                                                              | 61.0        | 62.1      | 63.4                  | 61.6                  | 61.0                     | 60.5                        |
| C4                                                              | 32.2        | 33.0      | 33.9                  | 34.4                  | 34.5                     | 33.1                        |
| C5                                                              | 7.9         | 2.6       | 4.8                   | 8.0                   | 9.4                      | 6.5                         |
| C6                                                              | 169.9       | 172.4     | 172.3                 | 171.8                 | 171.2                    | 170.5                       |
| C7                                                              | 173.2       | 174.5     | 174.5                 | 174.3                 | 173.9                    | 173.6                       |
| C8                                                              | 127.0       | 126.3     | 126.1                 | 126.8                 | 126.9                    | 125.7                       |
| C9                                                              | 130.2       | 129.7     | 128.6                 | 129.9                 | 130.0                    | 129.4                       |
| C10                                                             | 129.3       | 128.6     | 127.7                 | 129.3                 | 129.6                    | 128.5                       |
| C11                                                             | 127.0       | 125.7     | 124.6                 | 126.3                 | 126.5                    | 125.7                       |
| C12                                                             | 127.0       | 127.0     | 126.7                 | 128.0                 | 128.1                    | 126.8                       |
| N                                                               | 113.9       | 122.0     | 121.2                 | 117.6                 | 116.3                    | 117.5                       |
| N                                                               | 108.3       | 114.0     | 113.1                 | 110.4                 | 109.2                    | 110.0                       |
| <b>Form II (<math>Z' = 3</math>): Molecule C</b>                |             |           |                       |                       |                          |                             |
| C1                                                              | 147.2       | 146.1     | 146.4                 | 147.0                 | 147.5                    | 147.6                       |
| C2                                                              | 137.2       | 139.0     | 137.9                 | 137.0                 | 136.5                    | 137.4                       |
| C3                                                              | 62.4        | 63.1      | 64.2                  | 62.3                  | 61.6                     | 60.9                        |
| C4                                                              | 27.2        | 26.3      | 27.5                  | 28.4                  | 28.8                     | 27.2                        |
| C5                                                              | 8.9         | 2.8       | 5.0                   | 8.2                   | 9.6                      | 6.7                         |
| C6                                                              | 173.2       | 176.6     | 176.4                 | 176.2                 | 175.8                    | 175.5                       |
| C7                                                              | 175.0       | 175.7     | 175.7                 | 175.3                 | 174.7                    | 174.0                       |
| C8                                                              | 125.4       | 124.7     | 124.4                 | 125.9                 | 126.2                    | 124.7                       |
| C9                                                              | 133.7       | 130.8     | 129.8                 | 131.0                 | 131.2                    | 130.7                       |
| C10                                                             | 130.2       | 130.7     | 129.9                 | 131.3                 | 131.5                    | 130.5                       |
| C11                                                             | 130.2       | 133.7     | 132.7                 | 133.6                 | 133.7                    | 133.3                       |
| C12                                                             | 125.8       | 123.8     | 123.7                 | 124.6                 | 124.7                    | 123.3                       |
| N                                                               | 115.2       | 124.5     | 124.3                 | 120.4                 | 119.1                    | 120.4                       |
| N                                                               | 109.8       | 115.7     | 114.6                 | 111.7                 | 110.3                    | 111.3                       |
| <b>Form III</b>                                                 |             |           |                       |                       |                          |                             |
| C1                                                              | 149.0       | 147.6     | 147.9                 | 148.6                 | 149.1                    | 149.2                       |
| C2                                                              | 137.6       | 139.2     | 137.9                 | 137.1                 | 136.5                    | 137.3                       |
| C3                                                              | 62.3        | 63.9      | 64.9                  | 62.9                  | 62.2                     | 61.6                        |
| C4                                                              | 27.1        | 25.6      | 26.8                  | 28.0                  | 28.4                     | 26.8                        |
| C5                                                              | 11.4        | 6.7       | 9.0                   | 11.9                  | 13.3                     | 10.6                        |
| C6                                                              | 174.2       | 177.5     | 177.6                 | 177.0                 | 176.4                    | 175.6                       |
| C7                                                              | 174.2       | 175.2     | 175.2                 | 175.0                 | 174.7                    | 174.3                       |

*Continued on next page*

| Phenobarbital Chemical Shifts (ppm) using PBE-D3(BJ) Structures ( <i>continued</i> ) |             |            |                       |                       |                          |                             |
|--------------------------------------------------------------------------------------|-------------|------------|-----------------------|-----------------------|--------------------------|-----------------------------|
| Atom                                                                                 | Expt. Shift | GIPAW PBE  | GIPAW + $\Delta$ TPSS | GIPAW + $\Delta$ PBE0 | GIPAW + $\Delta$ PBE0-DH | GIPAW + $\Delta$ DSD-PBEP86 |
| C8                                                                                   | 127.6       | 126.9      | 126.8                 | 127.5                 | 127.6                    | 126.5                       |
| C9                                                                                   | 130.7       | 130.1      | 129.0                 | 130.2                 | 130.3                    | 129.7                       |
| C10                                                                                  | 129.5       | 128.6      | 127.8                 | 129.4                 | 129.6                    | 128.6                       |
| C11                                                                                  | 129.9       | 129.4      | 128.4                 | 129.8                 | 130.0                    | 129.5                       |
| C12                                                                                  | 127.6       | 126.9      | 126.7                 | 128.0                 | 128.2                    | 127.0                       |
| N                                                                                    | 114.5       | 120.7      | 120.2                 | 116.7                 | 115.3                    | 116.4                       |
| N                                                                                    | 108.6       | 114.8      | 113.7                 | 110.9                 | 109.5                    | 110.4                       |
| <sup>13</sup> C RMSE                                                                 |             | <b>2.3</b> | <b>2.1</b>            | <b>1.4</b>            | <b>1.4</b>               | <b>1.4</b>                  |
| <sup>15</sup> N RMSE                                                                 |             | <b>7.2</b> | <b>6.6</b>            | <b>3.2</b>            | <b>2.1</b>               | <b>3.1</b>                  |

**Table S19:** Experimental and predicted <sup>13</sup>C and <sup>15</sup>N chemical shifts (ppm) for two polymorphs of phenobarbital, using crystal structures optimized with PBE0-D3(BJ).

| Phenobarbital Chemical Shifts (ppm) using PBE0-D3(BJ) Structures |             |           |                       |                       |                          |                             |
|------------------------------------------------------------------|-------------|-----------|-----------------------|-----------------------|--------------------------|-----------------------------|
| Atom                                                             | Expt. Shift | GIPAW PBE | GIPAW + $\Delta$ TPSS | GIPAW + $\Delta$ PBE0 | GIPAW + $\Delta$ PBE0-DH | GIPAW + $\Delta$ DSD-PBEP86 |
| <b>Form II (<math>Z' = 3</math>): Molecule A</b>                 |             |           |                       |                       |                          |                             |
| C1                                                               | 147.2       | 146.5     | 146.6                 | 147.4                 | 147.9                    | 148.1                       |
| C2                                                               | 136.0       | 139.4     | 138.5                 | 137.5                 | 136.8                    | 137.4                       |
| C3                                                               | 61.7        | 63.2      | 64.6                  | 62.7                  | 61.9                     | 61.4                        |
| C4                                                               | 30.4        | 32.9      | 33.6                  | 34.0                  | 34.0                     | 32.6                        |
| C5                                                               | 6.9         | 2.1       | 4.3                   | 7.3                   | 8.7                      | 5.9                         |
| C6                                                               | 177.4       | 177.2     | 177.0                 | 176.6                 | 176.0                    | 175.5                       |
| C7                                                               | 177.4       | 179.8     | 179.8                 | 179.3                 | 178.9                    | 178.8                       |
| C8                                                               | 125.8       | 129.8     | 129.5                 | 130.0                 | 130.0                    | 128.7                       |
| C9                                                               | 131.4       | 131.6     | 130.5                 | 131.8                 | 131.9                    | 131.4                       |
| C10                                                              | 132.4       | 132.6     | 131.7                 | 133.1                 | 133.3                    | 132.5                       |
| C11                                                              | 132.8       | 131.0     | 130.0                 | 131.3                 | 131.5                    | 130.9                       |
| C12                                                              | 129.7       | 127.7     | 127.3                 | 128.6                 | 128.7                    | 127.5                       |
| N                                                                | 116.1       | 123.9     | 123.5                 | 119.7                 | 118.5                    | 119.8                       |
| N                                                                | 111.5       | 117.2     | 116.7                 | 113.8                 | 112.7                    | 113.7                       |
| <b>Form II (<math>Z' = 3</math>): Molecule B</b>                 |             |           |                       |                       |                          |                             |
| C1                                                               | 148.9       | 147.9     | 148.1                 | 148.9                 | 149.5                    | 149.7                       |
| C2                                                               | 137.2       | 140.8     | 139.7                 | 138.8                 | 138.0                    | 138.6                       |
| C3                                                               | 61.0        | 62.1      | 63.4                  | 61.5                  | 60.9                     | 60.3                        |
| C4                                                               | 32.2        | 33.7      | 34.6                  | 35.0                  | 35.1                     | 33.8                        |
| C5                                                               | 7.9         | 3.3       | 5.5                   | 8.5                   | 9.9                      | 7.2                         |
| C6                                                               | 169.9       | 172.6     | 172.4                 | 171.9                 | 171.4                    | 170.8                       |
| C7                                                               | 173.2       | 174.5     | 174.5                 | 174.2                 | 173.9                    | 173.7                       |
| C8                                                               | 127.0       | 127.6     | 127.3                 | 128.0                 | 128.0                    | 126.8                       |
| C9                                                               | 130.2       | 126.8     | 125.6                 | 127.2                 | 127.3                    | 126.5                       |
| C10                                                              | 129.3       | 129.6     | 128.6                 | 130.3                 | 130.5                    | 129.5                       |
| C11                                                              | 127.0       | 130.7     | 129.6                 | 131.0                 | 131.1                    | 130.5                       |
| C12                                                              | 127.0       | 128.2     | 127.8                 | 129.0                 | 129.2                    | 127.9                       |
| N                                                                | 113.9       | 121.8     | 121.1                 | 117.6                 | 116.3                    | 117.6                       |
| N                                                                | 108.3       | 113.7     | 113.0                 | 110.3                 | 109.2                    | 110.0                       |
| <b>Form II (<math>Z' = 3</math>): Molecule C</b>                 |             |           |                       |                       |                          |                             |
| C1                                                               | 147.2       | 146.3     | 146.4                 | 147.2                 | 147.7                    | 147.8                       |
| C2                                                               | 137.2       | 140.4     | 139.2                 | 138.3                 | 137.8                    | 138.6                       |
| C3                                                               | 62.4        | 63.2      | 64.3                  | 62.3                  | 61.6                     | 60.9                        |
| C4                                                               | 27.2        | 27.2      | 28.4                  | 29.2                  | 29.6                     | 28.0                        |
| C5                                                               | 8.9         | 3.5       | 5.7                   | 8.7                   | 10.1                     | 7.4                         |
| C6                                                               | 173.2       | 176.1     | 176.2                 | 175.9                 | 175.5                    | 175.4                       |
| C7                                                               | 175.0       | 175.5     | 175.5                 | 175.1                 | 174.5                    | 174.0                       |
| C8                                                               | 125.4       | 125.9     | 125.6                 | 127.1                 | 127.3                    | 125.9                       |
| C9                                                               | 133.7       | 131.7     | 130.7                 | 132.0                 | 132.1                    | 131.5                       |
| C10                                                              | 130.2       | 131.9     | 131.0                 | 132.5                 | 132.6                    | 131.7                       |

*Continued on next page*

**Phenobarbital Chemical Shifts (ppm) using PBE0-D3(BJ) Structures (continued)**

| Atom                 | Expt. Shift | GIPAW PBE  | GIPAW + $\Delta$ TPSS | GIPAW + $\Delta$ PBE0 | GIPAW + $\Delta$ PBE0-DH | GIPAW + $\Delta$ DSD-PBEP86 |
|----------------------|-------------|------------|-----------------------|-----------------------|--------------------------|-----------------------------|
| C11                  | 130.2       | 134.5      | 133.5                 | 134.5                 | 134.5                    | 134.1                       |
| C12                  | 125.8       | 125.0      | 124.9                 | 125.7                 | 125.8                    | 124.5                       |
| N                    | 115.2       | 123.4      | 122.9                 | 119.2                 | 117.9                    | 119.2                       |
| N                    | 109.8       | 115.0      | 114.5                 | 111.7                 | 110.5                    | 111.2                       |
| <b>Form III</b>      |             |            |                       |                       |                          |                             |
| C1                   | 149.0       | 147.7      | 147.9                 | 148.6                 | 149.2                    | 149.4                       |
| C2                   | 137.6       | 140.4      | 139.1                 | 138.3                 | 137.7                    | 138.5                       |
| C3                   | 62.3        | 63.8       | 64.8                  | 62.7                  | 62.0                     | 61.4                        |
| C4                   | 27.1        | 26.5       | 27.7                  | 28.6                  | 29.0                     | 27.5                        |
| C5                   | 11.4        | 7.3        | 9.5                   | 12.3                  | 13.7                     | 11.2                        |
| C6                   | 174.2       | 177.0      | 177.2                 | 176.6                 | 176.0                    | 175.4                       |
| C7                   | 174.2       | 174.8      | 174.8                 | 174.7                 | 174.3                    | 174.1                       |
| C8                   | 127.6       | 127.9      | 127.7                 | 128.4                 | 128.5                    | 127.4                       |
| C9                   | 130.7       | 131.5      | 130.3                 | 131.5                 | 131.6                    | 131.0                       |
| C10                  | 129.5       | 129.7      | 128.7                 | 130.4                 | 130.6                    | 129.7                       |
| C11                  | 129.9       | 130.4      | 129.3                 | 130.8                 | 130.9                    | 130.4                       |
| C12                  | 127.6       | 127.9      | 127.6                 | 128.9                 | 129.1                    | 127.9                       |
| N                    | 114.5       | 119.9      | 119.3                 | 116.0                 | 114.7                    | 115.8                       |
| N                    | 108.6       | 114.3      | 113.7                 | 110.8                 | 109.6                    | 110.4                       |
| <sup>13</sup> C RMSE |             | <b>2.3</b> | <b>2.1</b>            | <b>1.8</b>            | <b>1.8</b>               | <b>1.6</b>                  |
| <sup>15</sup> N RMSE |             | <b>6.6</b> | <b>6.0</b>            | <b>2.8</b>            | <b>1.7</b>               | <b>2.7</b>                  |

## References

- (1) McKinley, J. L.; Beran, G. J. O. Improving predicted nuclear magnetic resonance chemical shifts using the quasi-harmonic approximation. *J. Chem. Theory Comput.* **2019**, *15*, 5259–5274.
- (2) Chisholm, J. A.; Motherwell, W. D. S. COMPACK: A program for identifying crystal structure similarity using distances. *J. Appl. Crystall.* **2005**, *38*, 228–231.
- (3) Hartman, J. D.; Day, G. M.; Beran, G. J. O. Enhanced NMR discrimination of pharmaceutically relevant molecular crystal forms through fragment-based ab initio chemical shift predictions. *Cryst. Growth Des.* **2016**, *16*, 6479–6493.
